# Supplementary material for: Transcriptomic Profiling of the Liver Sinusoidal Endothelium during Cirrhosis Reveals Stage-Specific Secretory Signature
Source: MDPI journal article supplement (doi:10.3390/cancers13112688), 2021-05-29
Supplement: s1 [file s1]

# Supplementary Materials: Transcriptomic Profiling of the Liver Sinusoidal Endothelium During Cirrhosis Reveals Stage-Specific Secretory Signature

Nicolò Manicardi, Anabel Fernández-Iglesias, Laia Abad-Jordà, Felix Royo, Mikel Azkargorta, Martí Ortega-Ribera, David Sanfeliu-Redondo, Ana Martínez-Alcocer, Felix Elortza, Amelia J Hessheimer, Constantino Fondevila, Juan José Lozano, Juan Carlos García-Pagán, Jaime Bosch, Francisco Javier Cubero, Agustín Albillos, Javier Vaquero, Juan M. Falcón-Pérez and Jordi Gracia-Sancho

## Supplementary Materials & Methods:

### 1. Rat Hepatic Cells Isolation

Rats weighing 300–350 g were anesthetized with ketamine (100 mg/kg body weight, Imalgene 1000; Merial) plus midazolam (5 mg/kg body weight; Laboratorio Reig Jofre, S.A., ES) administered intraperitoneally.

Hepatocytes and NPCs were isolated using a well-established protocol as mentioned in the main manuscript. Briefly, rat livers were perfused through the portal vein with Hanks hepes buffer containing ethylene glycol-bis (2-aminoethylether)-N,N,N',N'-tetraacetic acid (E4378, Sigma, USA) and BSA (A1391,0100, Applichem, DE). Liver digestion was performed during 30 min with Hanks hepes containing 0.015% collagenase A (10103586001, Roche, DE). The resultant digested liver was excised, and additional *in vitro* digestion was performed at 37°C with 0.01% collagenase A for 10 min. Disaggregated tissue was filtered using 100 µm nylon strainer, collected in cold Krebs buffer and centrifuged at 50g for 5 min at 4°C for hepatocytes purification. Hepatocytes were seeded in collagen coated 48 wells plate and cultured in DMEMF12 (21041-025, Gibco, UK) supplemented with 2% exosome-depleted FBS (A2720803, Gibco, UK), 1% L-glutamine, 1% penicillin plus 1% streptomycin, 1 nM dexamethasone (D4902, Sigma, USA), 1 µM insulin (103755, HCB) and 1% amphotericin B.

The resulting supernatant was centrifuged twice at 800g for 10 min and the obtained pellet was subjected to differential centrifugation (1400g, 21 minutes at 4°C without break) using iodixanol (D1556, Sigma, MO, USA) to perform two gradients (17–11.5%). The upper interphase of the gradient contained HSCs while the lower interphase was enriched of HMΦ and LSECs. HSCs were collected, seeded in 48 wells plated and cultured in IMDM (21980-032, Invitrogen, Gibco, UK) supplemented with 10% exosome-depleted FBS, 1% L-glutamine, 1% penicillin plus 1% streptomycin and 1% amphotericin B.

HMΦ and LSECs were collected and LSECs were isolated by selective cell adhesion to substrate. HMΦ were seeded in 48 wells plate and cultured in RPMI-1640 medium supplemented with 10% exosome-depleted FBS, 1% L-glutamine, 1% penicillin plus 1% streptomycin and 1% amphotericin B.

LSECs were seeded on collagen coated plates (37°C, 5% CO<sub>2</sub>) in RPMI-1640 without Phenol Red (01-103-1A, Biological Industries, CT, USA) supplemented with penicillin-streptomycin solution 1%, amphotericin B 1%, L-glutamine 1% and exosome-depleted FBS 10%. After 1h, LSECs were lysed with QIAzol reagent for total RNA extraction using the miRNeasy microkit following the manufacturer's instructions. RNA samples were stored at -80°C for subsequent total RNA sequencing. In additional experiments, LSECs were cultured 16h for supernatant collection.

### 2. Human Liver Sinusoidal Endothelial Cells isolation

Liver tissue piece approximately weighting 10–20g was cannulated and perfused with Hanks hepes (H3375, Sigma, USA) buffer to eliminate the excessive blood [1].

**Citation:** Manicardi, N.; Fernández-Iglesias, A.; Abad-Jordà, L.; Royo, F.; Azkargorta, M.; Ortega-Ribera, M.; Sanfeliu-Redondo, D.; Martínez-Alcocer, A.; Elortza, F.; Hessheimer, A.J.; et al. Transcriptomic Profiling of The Liver Sinusoidal Endothelium During Cirrhosis Reveals Stage-Specific Secretory Signature. *Cancers* **2021**, *13*, 2688. <https://doi.org/10.3390/cancers13112688>

Academic Editor: Claudio Tiribelli

Received: 21 April 2021

Accepted: 25 May 2021

Published: 29 May 2021

**Publisher's Note:** MDPI stays neutral with regard to jurisdictional claims in published maps and institutional affiliations.

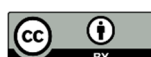

**Copyright:** © 2021 by the authors. Licensee MDPI, Basel, Switzerland. This article is an open access article distributed under the terms and conditions of the Creative Commons Attribution (CC BY) license (<http://creativecommons.org/licenses/by/4.0/>).

Following, digestion process was performed with Hanks hepes containing 280 U/mL of collagenase A (C5138, Sigma, Spain) and DNase (10 mg/mL) (18535, Serva, Germany) for 20 min with recirculation buffer. The resultant digested liver was removed, disaggregated, filtered using sterile gauze, and collected in cold Krebs buffer to discard hepatocytes by low-speed centrifugation. Non-parenchymal cells (NPCs) were pelleted by centrifugation at 800g for 10 minutes at 4°C, and LSECs were labeled by incubation with human CD32 primary antibody (1:1000; Fitzgerald, MA, USA) and isolated by immunomagnetism with Dynabeads® CELlection Pan Mouse IgG Kit (11531D, ThermoFisher Scientific, USA) according to the manufacturer's instructions [2].

CD32b was selected as LSECs phenotypic marker considering its abundance and characteristic expression in healthy and cirrhotic LSECs [2–5], which indeed agreed with CD32b protein expression in whole human liver tissue assessed by IF (Figure S6A). Additionally, the gene set enrichment analysis (GSEA) comparing the human CD32b<sup>+</sup> cells used in the present study and different subsets of endothelial cells described in [5] suggest that isolated human CD32b<sup>+</sup> cells mostly correspond sub-population Endo(1), identified as LSECs, Endo(3) and Endo(6), identified as scar-associated LSECs, in the single-cell analysis of Ramachandran P et al. [5] (Figure S6C–D).

LSECs were resuspended in RPMI-1640 (010101-1A, Biological Industries, CT, USA) supplemented with 1% FBS (04-077-1A, Biological Industries, CT, USA), 1% penicillin and 1% streptomycin (03-331-1C, Biological Industries, CT, USA), 2 mM L-glutamine (25030-024, Gibco, UK), 1% amphotericin B (03-029-1C, Biological Industries, CT, USA), 1% endothelial cell growth supplement (ECGS, 02-102, Merck, DE) and 100 mg/mL heparin (H3393-100KU, Sigma, MO, USA), and seeded in collagen-coated plates for 1 h (37°C, 5% CO<sub>2</sub>). LSECs were collected with QIAzol lysis reagent (79306, Qiagen, MA, USA) for RNA extraction using miRNeasy microkit (74004, Qiagen, DE) for subsequent RNA sequencing. Purity of isolated LSECs was routinely validated by presence of fenestrae visualized by scanning electron microscopy (Figure S6B), and very low or non-detectable expression of HMΦs, HSCs and hepatocytes markers (Figure S6G).

### 3. Nanoparticle Tracking Analysis

Quantity and concentration of isolated EVs were assessed by nanoparticle tracking analysis using the NanoSight NS300 instrumentation (Malvern Panalytical, UK). EVs samples were diluted with PBS and 3 videos of 20 seconds were taken for each sample. Results were analyzed using NanoSight software NTA 3.4.

### 4. MicroBCA™ Colorimetric Protein Assay

The total amount of EVs-associated protein of each secretome fraction was quantified by MicroBCA colorimetric protein assay (23235, Thermo Scientific, IL, USA) following the manufacturer's instructions.

### 5. EVs Immunoblotting

EVs purity was assessed by immuno-blot detection of EVs associated markers (CD63, CD81) and endoplasmic reticulum and mitochondria related ones (GRP-78, COX-IV). As suggested by the guidelines [6], samples for CD63 and CD81 detection were prepared in denaturing but not reducing conditions while denaturing and reducing conditions were used for GRP-78 and COX-IV detection. For detailed description of the antibodies see Table S17.

### 6. Cryo-Electron Microscopy

Small EVs samples were analysed by cryo-electron microscopy in collaboration with the Electron Microscopy Platform CIC BioGUNE (Derio, Spain). EVs preparations were directly adsorbed onto glow-discharged holey carbon grids (QUANTIFOIL, Germany). Grids were blotted at 95% humidity and rapidly plunged into liquid ethane with the aid

of a VITROBOT (Maastricht Instruments BV, The Netherlands). Vitrified samples were imaged at liquid nitrogen temperature using a JEM-2200FS/CR transmission cryo-electron microscope (JEOL, Japan) equipped with a field emission gun and operated at an acceleration voltage of 200 kV. Cryo-TEM procedure spotted a heterogeneous population of LSECs EVs (Figure S4C).

## 7. LSECs' Secretome Proteomics

### 7.1. In solution digestion:

Samples were incubated in a solution containing 7M urea 2M Thiourea 4% CHAPS and 5mM DTT for 30 min at RT under agitation and digested following the filter-aided FASP protocol described by Wisniewski et al [7] with minor modifications. Trypsin was added to a trypsin:protein ratio of 1:50, and the mixture was incubated overnight at 37°C, dried out in a RVC2 25 speedvac concentrator (Christ), and resuspended in 0.1% FA. Peptides were desalted and resuspended in 0.1% FA using C18 stage tips (Millipore).

### 7.2. Mass spectrometry analysis:

Samples were analyzed in a novel hybrid trapped ion mobility spectrometry – quadrupole time of flight mass spectrometer (timsTOF Pro with PASEF, Bruker Daltonics) coupled online to a nanoElute liquid chromatograph (Bruker). This mass spectrometer takes advantage of a novel scan mode termed parallel accumulation – serial fragmentation (PASEF), which multiplies the sequencing speed without any loss in sensitivity [8] and has been proven to provide outstanding analytical speed and sensibility for proteomics analyses [9]. Sample (200ng) was directly loaded in a 15 cm Bruker nanoelute FIFTEEN C18 analytical column (Bruker) and resolved at 400 nL/min with a 30 min gradient. Column was heated to 50°C using an oven.

Protein identification and quantification was carried out using PEAKS software (Bioinformatics solutions). Searches were carried out against a database consisting of *Bos taurus* and *Rattus norvegicus* entries (Uniprot/Swissprot), with precursor and fragment tolerances of 20 ppm and 0.05 Da. Only proteins identified with at least two peptides at FDR<1% were considered for further analysis. Data was loaded onto Perseus platform and further processed (log2 transformation, imputation). A t-test was applied in order to determine the statistical significance of the differences detected and heatmaps were generated. Results were then filtered for *Rattus norvegicus*.

## 8. Selection Criteria for Small Evs Proteomics

The whole proteome sequencing generated 1643 results that were subsequently filtered with the following criteria. The first criterium was to consider those detections in which more than 1 peptide had been detected for each protein, reducing the list to 1042 detections. Of the 1042 detections, 381 were for *Bos Taurus* and 661 for *Rattus norvegicus*. The following criterium was to separate the entries for species, considering only the 661 proteins detected for *Rattus norvegicus*. We then observed whether the proteins were also been detected in the medium proceeding from culture wells where no cells had been seeded. The medium was supplemented as detailed in the paragraph 1 of the present document. With this third criterium, 428 proteins were undetected in the medium while 233 did. From the remaining 428 proteins we decided to further sieve them with an additional criterium, considering only those proteins whose Unique/Peptide ratio were > 0.5. With this one last criterium we wanted to be sure that the peptide sequences detected by the MS-LC were unique for the protein associated to those peptides. The remaining proteins were thus narrowed down to the 345 that had been used to run the IPA analysis.

## 9. HSCs Immunofluorescence

Cells were seeded on coverglasses of 18 mm diameter (Cat. #72222-01 Circular coverglass, Electron Microscopy Sciences, USA) and treated for 48h with 500 ng/μL complete

secretome (CS) proceeding from healthy and cirrhotic rat LSECs. Cells were fixed with 4% paraformaldehyde solution in PBS (SC-281692, Santa Cruz Biotechnology, CA, USA) for 10 minutes, rinsed thrice with PBS and permeabilized with 0.1% triton X-100 (9002-93-1, Sigma, MO, USA) in PBS for 5 minutes. Unspecific binding sites were blocked for 30 minutes with 1% BSA in PBS and subsequently incubated 2h at RT with the primary antibody against  $\alpha$ SMA (1:200, 2547 Sigma). Anti-mouse Alexa Fluor 488 (1:300, A21202, Invitrogen, OR, USA) was incubated 1h at RT in combination with DAPI to stain nuclei (1  $\mu$ g/mL, 10232676001, Roche, DE). Fifteen images per preparation were captured with a spectral confocal microscope (Leica TCS-SP5, DE). Images were taken at 400X magnification and image analysis of fluorescence was performed using ImageJ (Fiji) software [10]. The same settings were maintained while quantifying images from the same experiment. Intensities were normalized to the number of cells per field.

### 10. cDNA conversion and real time RT-PCR assay

Equal amount of RNA was converted to cDNA using the High Capacity cDNA Reverse Transcription kit (4368814, Applied Biosystems™, Vilnius, LT). cDNA samples were amplified by real-time RT-PCR on ABI PRISM 7900HT (Applied Biosystems™). Rat specific primers designed using sequence data and Nucleotide BLAST software from the National Center for Biotechnology Information (NCBI, MD, USA) database, and Taqman pre-designed probes for TPM1 experiments were used with specific mastermix (Applied Biosystems™) (Table S18). Gene expression of specific gene was calculated based on the  $\Delta\Delta C_t$  method. The results were expressed as  $2^{-\Delta\Delta C_t}$  referred as fold-expression compared to control group.

### 11. Western Blot Assay

Cells samples were collected with protein lysis buffer Halt™ Protease and Phosphatase Inhibitor Cocktail (78448, Thermo Fisher Scientific, USA), centrifuged at 4°C 10 min at 14,000g and supernatant was mixed with Laemmli sample buffer (1610747, Bio-Rad Laboratories, CA, USA) and  $\beta$ -mercaptoethanol following manufacturer's instructions. Equal amounts of protein were run on sodium dodecylsulphate polyacrylamide gel. Transferred nitrocellulose membrane was blocked with Tris-buffer saline containing 0.05% Tween-20 and 5% non-fat dry milk or 3% BSA, and subsequently incubated overnight at 4°C with primary antibodies against TPM1 and  $\alpha$ -Tubulin as endogenous control; all at 1:1000 dilution. After the incubation with the corresponding secondary peroxidase-coupled antibody, blots were revealed by chemiluminescence (ECL, Amersham) using LAS4000 (GE Healthcare, Spain) and protein expression was evaluated by densitometric analysis using Image Studio software (LI-COR Biosciences, USA). Whole membrane blots are represented in Figure S7. For detailed description of the antibodies see Table S17.

### Supplementary Tables

**Table S1.** Top 25 up- & down-regulated genes in CCl<sub>4</sub>-cirrhotic rat LSECs.

| Gene symbol   | Fold-change | p-value | fdr   |
|---------------|-------------|---------|-------|
| <i>Ccl21</i>  | 335.00      | 0.000   | 0.000 |
| <i>Sema3a</i> | 63.56       | 0.000   | 0.000 |
| <i>Piezo2</i> | 33.79       | 0.000   | 0.000 |
| <i>Clic5</i>  | 26.83       | 0.000   | 0.000 |
| <i>Rgs5</i>   | 26.12       | 0.000   | 0.000 |
| <i>Igsf3</i>  | 25.93       | 0.000   | 0.000 |
| <i>Sema3d</i> | 25.04       | 0.000   | 0.000 |
| <i>Chrdl1</i> | 24.32       | 0.000   | 0.000 |
| <i>Flnc</i>   | 22.28       | 0.000   | 0.000 |
| <i>Mmp12</i>  | 20.30       | 0.000   | 0.000 |

|                 |        |       |       |
|-----------------|--------|-------|-------|
| <i>Cyp1a1</i>   | 19.48  | 0.000 | 0.002 |
| <i>Lpl</i>      | 19.44  | 0.000 | 0.000 |
| <i>Casc4</i>    | 19.24  | 0.000 | 0.000 |
| <i>Dcn</i>      | 19.24  | 0.000 | 0.000 |
| <i>Il6</i>      | 19.12  | 0.000 | 0.000 |
| <i>Robo2</i>    | 19.07  | 0.000 | 0.000 |
| <i>Igsf10</i>   | 18.95  | 0.000 | 0.000 |
| <i>Ano1</i>     | 18.36  | 0.000 | 0.000 |
| <i>Pnoc</i>     | 17.98  | 0.000 | 0.000 |
| <i>Pdpn</i>     | 17.93  | 0.000 | 0.000 |
| <i>Prss23</i>   | 17.82  | 0.000 | 0.000 |
| <i>Adamts12</i> | 16.87  | 0.000 | 0.000 |
| <i>Ogn</i>      | 16.56  | 0.000 | 0.000 |
| <i>Mgp</i>      | 16.06  | 0.000 | 0.000 |
| <i>Ednrb</i>    | 15.82  | 0.000 | 0.000 |
| <i>Gcat</i>     | -5.04  | 0.000 | 0.001 |
| <i>Dcxr</i>     | -5.10  | 0.000 | 0.002 |
| <i>Gpr153</i>   | -5.13  | 0.000 | 0.000 |
| <i>Plch2</i>    | -5.23  | 0.001 | 0.004 |
| <i>Akr7a2</i>   | -5.28  | 0.000 | 0.000 |
| <i>Hoxb5</i>    | -5.31  | 0.000 | 0.000 |
| <i>Cpne5</i>    | -5.33  | 0.000 | 0.000 |
| <i>Igdcc3</i>   | -5.33  | 0.001 | 0.004 |
| <i>Kcp</i>      | -5.43  | 0.000 | 0.000 |
| <i>Slco2b1</i>  | -5.48  | 0.000 | 0.000 |
| <i>Slc22a8</i>  | -5.67  | 0.006 | 0.013 |
| <i>Gpt</i>      | -6.35  | 0.001 | 0.003 |
| <i>Tmem132e</i> | -6.61  | 0.000 | 0.000 |
| <i>Jph3</i>     | -6.62  | 0.000 | 0.000 |
| <i>Slc46a1</i>  | -6.72  | 0.000 | 0.001 |
| <i>Cib2</i>     | -6.93  | 0.000 | 0.000 |
| <i>Ptpru</i>    | -7.48  | 0.000 | 0.000 |
| <i>Hal</i>      | -8.02  | 0.002 | 0.005 |
| <i>Cabp2</i>    | -8.22  | 0.001 | 0.003 |
| <i>Igf2bp2</i>  | -8.89  | 0.000 | 0.000 |
| <i>Hba1</i>     | -9.48  | 0.034 | 0.055 |
| <i>Cntfr</i>    | -9.54  | 0.000 | 0.000 |
| <i>Stac3</i>    | -16.10 | 0.001 | 0.003 |
| <i>Grik4</i>    | -18.73 | 0.000 | 0.000 |
| <i>Ihh</i>      | -31.75 | 0.000 | 0.000 |

Table S2. Top 25 up- &amp; down-regulated genes in TAA-cirrhotic rat LSECs.

| Gene symbol    | Fold-change | p-value | fdr   |
|----------------|-------------|---------|-------|
| <i>Ccl21</i>   | 279.90      | 0.000   | 0.000 |
| <i>Chrdl1</i>  | 215.06      | 0.000   | 0.000 |
| <i>Pdpn</i>    | 93.61       | 0.000   | 0.000 |
| <i>Igfbp5</i>  | 92.49       | 0.000   | 0.000 |
| <i>Adamts8</i> | 76.68       | 0.000   | 0.000 |
| <i>Flnc</i>    | 69.78       | 0.000   | 0.000 |
| <i>Sema3a</i>  | 69.32       | 0.000   | 0.000 |
| <i>Igsf3</i>   | 57.78       | 0.000   | 0.000 |

|                     |        |       |       |
|---------------------|--------|-------|-------|
| <i>Piezo2</i>       | 46.72  | 0.000 | 0.000 |
| <i>Loxl1</i>        | 40.65  | 0.000 | 0.000 |
| <i>Pnoc</i>         | 39.43  | 0.000 | 0.000 |
| <i>Notch3</i>       | 37.98  | 0.000 | 0.000 |
| <i>Col12a1</i>      | 36.61  | 0.000 | 0.000 |
| <i>Cdh3</i>         | 36.02  | 0.000 | 0.000 |
| <i>Fblim1</i>       | 34.46  | 0.000 | 0.000 |
| <i>Pdgfrb</i>       | 34.18  | 0.000 | 0.000 |
| <i>Ednra</i>        | 32.14  | 0.000 | 0.000 |
| <i>Prss23</i>       | 31.34  | 0.000 | 0.000 |
| <i>Lamb1</i>        | 30.41  | 0.000 | 0.000 |
| <i>Plod2</i>        | 30.15  | 0.000 | 0.000 |
| <i>Adamts2</i>      | 29.52  | 0.000 | 0.000 |
| <i>Col1a1</i>       | 29.06  | 0.000 | 0.000 |
| <i>Col8a1</i>       | 27.94  | 0.000 | 0.000 |
| <i>Ltbp2</i>        | 27.69  | 0.000 | 0.000 |
| <i>Cxcl14</i>       | 27.49  | 0.000 | 0.000 |
| <i>Ikzf3</i>        | -11.51 | 0.000 | 0.002 |
| <i>LOC100359515</i> | -11.76 | 0.003 | 0.009 |
| <i>Il2rb</i>        | -12.69 | 0.000 | 0.001 |
| <i>Tagap</i>        | -12.94 | 0.000 | 0.001 |
| <i>Klrc2</i>        | -13.27 | 0.000 | 0.001 |
| <i>Cd7</i>          | -13.67 | 0.000 | 0.001 |
| <i>Zbp1</i>         | -13.80 | 0.000 | 0.001 |
| <i>Klrb1b</i>       | -15.57 | 0.000 | 0.001 |
| <i>Art2b</i>        | -16.00 | 0.000 | 0.000 |
| <i>Klrd1</i>        | -16.55 | 0.000 | 0.000 |
| <i>Mylk3</i>        | -16.79 | 0.000 | 0.000 |
| <i>Cntfr</i>        | -17.20 | 0.000 | 0.000 |
| <i>Asb2</i>         | -18.88 | 0.000 | 0.000 |
| <i>LOC259244</i>    | -18.89 | 0.000 | 0.002 |
| <i>Cd69</i>         | -18.91 | 0.000 | 0.001 |
| <i>Ccl5</i>         | -19.09 | 0.000 | 0.000 |
| <i>Nkg7</i>         | -19.92 | 0.000 | 0.001 |
| <i>LOC259245</i>    | -21.38 | 0.000 | 0.002 |
| <i>Sh2d2a</i>       | -23.31 | 0.000 | 0.001 |
| <i>Igf2bp2</i>      | -27.44 | 0.000 | 0.000 |
| <i>Klri1</i>        | -27.79 | 0.000 | 0.001 |
| <i>Ihh</i>          | -33.16 | 0.000 | 0.000 |
| <i>Igdcc3</i>       | -33.90 | 0.000 | 0.000 |
| <i>Xcl1</i>         | -44.04 | 0.000 | 0.000 |
| <i>Oas2</i>         | -45.28 | 0.000 | 0.000 |

**Table S3.** Top 25 up- & down-regulated genes in cBDL-cirrhotic rat LSECs.

| Gene symbol   | Fold-change | p-value | fdr   |
|---------------|-------------|---------|-------|
| <i>Mmp12</i>  | 126.34      | 0.000   | 0.000 |
| <i>Gpnmb</i>  | 78.44       | 0.000   | 0.000 |
| <i>Igfbp5</i> | 59.80       | 0.000   | 0.000 |
| <i>Ccl21</i>  | 57.11       | 0.000   | 0.002 |
| <i>Fblim1</i> | 56.00       | 0.000   | 0.000 |
| <i>Igsf3</i>  | 46.96       | 0.000   | 0.000 |

|                   |         |       |       |
|-------------------|---------|-------|-------|
| <i>Ms4a4a</i>     | 44.65   | 0.000 | 0.002 |
| <i>Pla2g7</i>     | 44.07   | 0.000 | 0.000 |
| <i>Cd300lb</i>    | 40.98   | 0.001 | 0.002 |
| <i>Nat8l</i>      | 40.21   | 0.000 | 0.000 |
| <i>Chrdl1</i>     | 40.12   | 0.000 | 0.000 |
| <i>Mcemp1</i>     | 35.02   | 0.000 | 0.000 |
| <i>Lpl</i>        | 34.36   | 0.000 | 0.000 |
| <i>Pnoc</i>       | 33.40   | 0.000 | 0.003 |
| <i>Klhl41</i>     | 33.20   | 0.000 | 0.000 |
| <i>Lgals3</i>     | 31.47   | 0.000 | 0.001 |
| <i>B3galnt1</i>   | 31.25   | 0.000 | 0.000 |
| <i>Abcc9</i>      | 30.32   | 0.000 | 0.000 |
| <i>Lgals1</i>     | 30.31   | 0.000 | 0.000 |
| <i>Piezo2</i>     | 29.86   | 0.000 | 0.003 |
| <i>Capg</i>       | 29.45   | 0.000 | 0.001 |
| <i>Clec10a</i>    | 29.40   | 0.000 | 0.002 |
| <i>Sh3pxd2b</i>   | 28.73   | 0.000 | 0.000 |
| <i>Rab7b</i>      | 28.48   | 0.000 | 0.001 |
| <i>Fn1</i>        | 28.32   | 0.000 | 0.000 |
| <i>Cntfr</i>      | -12.61  | 0.000 | 0.000 |
| <i>Apoc2</i>      | -12.80  | 0.001 | 0.004 |
| <i>Hal</i>        | -13.07  | 0.002 | 0.007 |
| <i>Alb</i>        | -13.27  | 0.000 | 0.000 |
| <i>Tmem132e</i>   | -13.32  | 0.000 | 0.000 |
| <i>Slco1a1</i>    | -14.34  | 0.000 | 0.003 |
| <i>Serpina6</i>   | -14.36  | 0.000 | 0.001 |
| <i>Fabp1</i>      | -15.86  | 0.001 | 0.006 |
| <i>Vwa3b</i>      | -15.91  | 0.000 | 0.000 |
| <i>Col4a3</i>     | -15.92  | 0.000 | 0.000 |
| <i>Cyp4a2</i>     | -16.48  | 0.000 | 0.001 |
| <i>Cyp26c1</i>    | -16.60  | 0.000 | 0.000 |
| <i>Cyp2c7</i>     | -17.08  | 0.001 | 0.005 |
| <i>Astn2</i>      | -17.61  | 0.000 | 0.000 |
| <i>Cabp2</i>      | -23.26  | 0.001 | 0.003 |
| <i>Cyp26a1</i>    | -23.40  | 0.000 | 0.000 |
| <i>RGD1307603</i> | -35.60  | 0.000 | 0.001 |
| <i>Kcnd3</i>      | -38.19  | 0.000 | 0.000 |
| <i>Apoa4</i>      | -38.44  | 0.000 | 0.001 |
| <i>Slc22a8</i>    | -39.52  | 0.000 | 0.001 |
| <i>Stac3</i>      | -52.67  | 0.000 | 0.000 |
| <i>Mylk3</i>      | -55.39  | 0.000 | 0.000 |
| <i>Ihh</i>        | -59.76  | 0.000 | 0.000 |
| <i>Igdcc3</i>     | -70.70  | 0.000 | 0.000 |
| <i>Car3</i>       | -865.45 | 0.000 | 0.000 |

**Table S4.** Top common up- and down-regulated genes between CCl<sub>4</sub>-, TAA- and cBDL cirrhotic rat LSECs.

| Gene sym-<br>bol | Fold-change      |        |       | p-value          |       |       | fdr              |       |       |
|------------------|------------------|--------|-------|------------------|-------|-------|------------------|-------|-------|
|                  | CCl <sub>4</sub> | TAA    | cBDL  | CCl <sub>4</sub> | TAA   | cBDL  | CCl <sub>4</sub> | TAA   | cBDL  |
| <i>Ccl21</i>     | 335.00           | 279.90 | 57.11 | 0.000            | 0.000 | 0.000 | 0.000            | 0.000 | 0.002 |
| <i>Sema3a</i>    | 63.56            | 69.32  | 26.82 | 0.000            | 0.000 | 0.000 | 0.000            | 0.000 | 0.001 |

|                   |        |        |        |       |       |       |       |       |       |
|-------------------|--------|--------|--------|-------|-------|-------|-------|-------|-------|
| <i>Piezo2</i>     | 33.79  | 46.72  | 29.86  | 0.000 | 0.000 | 0.000 | 0.000 | 0.000 | 0.003 |
| <i>Clic5</i>      | 26.83  | 9.31   | 12.50  | 0.000 | 0.001 | 0.000 | 0.000 | 0.004 | 0.000 |
| <i>Rgs5</i>       | 26.12  | 19.96  | 17.96  | 0.000 | 0.000 | 0.003 | 0.000 | 0.000 | 0.008 |
| <i>Igsf3</i>      | 25.93  | 57.78  | 46.96  | 0.000 | 0.000 | 0.000 | 0.000 | 0.000 | 0.000 |
| <i>Sema3d</i>     | 25.04  | 13.45  | 7.46   | 0.000 | 0.000 | 0.010 | 0.000 | 0.000 | 0.023 |
| <i>Chrdl1</i>     | 24.32  | 215.06 | 40.12  | 0.000 | 0.000 | 0.000 | 0.000 | 0.000 | 0.000 |
| <i>Flnc</i>       | 22.28  | 69.78  | 11.93  | 0.000 | 0.000 | 0.001 | 0.000 | 0.000 | 0.003 |
| <i>Cyp1a1</i>     | 19.48  | 22.34  | 10.25  | 0.000 | 0.000 | 0.017 | 0.002 | 0.001 | 0.036 |
| <i>Lpl</i>        | 19.44  | 20.73  | 34.36  | 0.000 | 0.000 | 0.000 | 0.000 | 0.000 | 0.000 |
| <i>Casc4</i>      | 19.24  | 8.41   | 3.43   | 0.000 | 0.000 | 0.050 | 0.000 | 0.000 | 0.086 |
| <i>Dcn</i>        | 19.24  | 11.13  | 23.09  | 0.000 | 0.000 | 0.001 | 0.000 | 0.000 | 0.003 |
| <i>Il6</i>        | 19.12  | 18.28  | 4.46   | 0.000 | 0.000 | 0.005 | 0.000 | 0.000 | 0.014 |
| <i>Igsf10</i>     | 18.95  | 22.59  | 10.58  | 0.000 | 0.000 | 0.002 | 0.000 | 0.000 | 0.006 |
| <i>Ano1</i>       | 18.36  | 16.34  | 7.21   | 0.000 | 0.000 | 0.006 | 0.000 | 0.000 | 0.015 |
| <i>Pnoc</i>       | 17.98  | 39.43  | 33.40  | 0.000 | 0.000 | 0.001 | 0.000 | 0.000 | 0.003 |
| <i>Pdpn</i>       | 17.93  | 93.61  | 19.98  | 0.000 | 0.000 | 0.000 | 0.000 | 0.000 | 0.000 |
| <i>Prss23</i>     | 17.82  | 31.34  | 8.76   | 0.000 | 0.000 | 0.003 | 0.000 | 0.000 | 0.010 |
| <i>Adamts12</i>   | 16.87  | 15.53  | 8.58   | 0.000 | 0.000 | 0.000 | 0.000 | 0.000 | 0.001 |
| <i>Mgp</i>        | 16.06  | 19.08  | 21.59  | 0.000 | 0.000 | 0.005 | 0.000 | 0.000 | 0.013 |
| <i>Ednrb</i>      | 15.82  | 23.53  | 12.24  | 0.000 | 0.000 | 0.000 | 0.000 | 0.000 | 0.000 |
| <i>Apba2</i>      | 15.81  | 5.95   | 3.25   | 0.000 | 0.000 | 0.015 | 0.000 | 0.001 | 0.032 |
| <i>Plod2</i>      | 15.26  | 30.15  | 26.67  | 0.000 | 0.000 | 0.000 | 0.000 | 0.000 | 0.000 |
| <i>Col12a1</i>    | 14.73  | 36.61  | 25.48  | 0.000 | 0.000 | 0.001 | 0.000 | 0.000 | 0.005 |
| <i>Plpp7</i>      | -4.37  | -2.98  | -5.17  | 0.000 | 0.002 | 0.000 | 0.000 | 0.006 | 0.000 |
| <i>Fam78b</i>     | -4.62  | -3.28  | -3.07  | 0.000 | 0.000 | 0.000 | 0.000 | 0.000 | 0.000 |
| <i>Astn2</i>      | -4.65  | -2.23  | -17.61 | 0.000 | 0.000 | 0.000 | 0.000 | 0.000 | 0.000 |
| <i>Gstp1</i>      | -4.70  | -1.56  | -2.56  | 0.000 | 0.000 | 0.000 | 0.000 | 0.001 | 0.000 |
| <i>Aatk</i>       | -4.76  | -2.62  | -4.82  | 0.000 | 0.000 | 0.000 | 0.000 | 0.000 | 0.000 |
| <i>Ier5l</i>      | -4.80  | -1.79  | -1.84  | 0.000 | 0.002 | 0.006 | 0.000 | 0.008 | 0.015 |
| <i>Lrg1</i>       | -4.84  | -2.40  | -4.62  | 0.000 | 0.000 | 0.000 | 0.000 | 0.000 | 0.000 |
| <i>RT1-S2</i>     | -4.87  | -2.20  | -2.34  | 0.005 | 0.000 | 0.000 | 0.011 | 0.000 | 0.002 |
| <i>Islr</i>       | -5.00  | -1.74  | -2.34  | 0.000 | 0.028 | 0.021 | 0.000 | 0.056 | 0.044 |
| <i>Gpr153</i>     | -5.13  | -1.72  | -4.90  | 0.000 | 0.000 | 0.000 | 0.000 | 0.002 | 0.000 |
| <i>Hoxb5</i>      | -5.31  | -2.76  | -3.89  | 0.000 | 0.000 | 0.000 | 0.000 | 0.001 | 0.000 |
| <i>Igdcc3</i>     | -5.33  | -33.90 | -70.70 | 0.001 | 0.000 | 0.000 | 0.004 | 0.000 | 0.000 |
| <i>Kcp</i>        | -5.43  | -4.47  | -10.80 | 0.000 | 0.000 | 0.000 | 0.000 | 0.002 | 0.000 |
| <i>Slco2b1</i>    | -5.48  | -4.24  | -9.93  | 0.000 | 0.000 | 0.000 | 0.000 | 0.000 | 0.002 |
| <i>Tmem132e</i>   | -6.61  | -2.56  | -13.32 | 0.000 | 0.000 | 0.000 | 0.000 | 0.001 | 0.000 |
| <i>Jph3</i>       | -6.62  | -2.27  | -10.63 | 0.000 | 0.000 | 0.000 | 0.000 | 0.002 | 0.000 |
| <i>Cib2</i>       | -6.93  | -2.01  | -3.54  | 0.000 | 0.006 | 0.016 | 0.000 | 0.015 | 0.035 |
| <i>Ptpru</i>      | -7.48  | -2.41  | -11.87 | 0.000 | 0.000 | 0.000 | 0.000 | 0.000 | 0.001 |
| <i>RGD1307603</i> | -7.81  | -2.52  | -35.60 | 0.003 | 0.019 | 0.000 | 0.007 | 0.041 | 0.001 |
| <i>Cabp2</i>      | -8.22  | -4.53  | -23.26 | 0.001 | 0.001 | 0.001 | 0.003 | 0.003 | 0.003 |
| <i>Igf2bp2</i>    | -8.89  | -27.44 | -7.25  | 0.000 | 0.000 | 0.000 | 0.000 | 0.000 | 0.000 |
| <i>Cntfr</i>      | -9.54  | -17.20 | -12.61 | 0.000 | 0.000 | 0.000 | 0.000 | 0.000 | 0.000 |
| <i>Stac3</i>      | -16.10 | -4.71  | -52.67 | 0.001 | 0.000 | 0.000 | 0.003 | 0.000 | 0.000 |
| <i>Grik4</i>      | -18.73 | -5.97  | -7.94  | 0.000 | 0.000 | 0.002 | 0.000 | 0.000 | 0.007 |
| <i>Ihh</i>        | -31.75 | -33.16 | -59.76 | 0.000 | 0.000 | 0.000 | 0.000 | 0.000 | 0.000 |



**Table S5.** Common DEG between CCl<sub>4</sub>-, TAA- and cBDL-cirrhotic rat LSECs defining extracellular exosomes components.

| Cellular Component: extracellular exosomes (GO:0070062) |                                                            |
|---------------------------------------------------------|------------------------------------------------------------|
| Gene symbol                                             | Gene Name                                                  |
| <i>Nt5e</i>                                             | 5' nucleotidase, ecto                                      |
| <i>LOC108351936</i>                                     | 60S ribosomal protein L30-like                             |
| <i>Aebp1</i>                                            | AE binding protein 1                                       |
| <i>Ahnak</i>                                            | AHNAK nucleoprotein                                        |
| <i>Cd9</i>                                              | CD9 molecule                                               |
| <i>Efh1</i>                                             | EF-hand domain family, member D1                           |
| <i>Efemp2</i>                                           | EGF-containing fibulin-like extracellular matrix protein 2 |
| <i>Ephb4</i>                                            | EPH receptor B4                                            |
| <i>Fkbp5</i>                                            | FK506 binding protein 5                                    |
| <i>Gprc5b</i>                                           | G protein-coupled receptor, class C, group 5, member B     |
| <i>Glpr2</i>                                            | GLI pathogenesis-related 2                                 |
| <i>Hid1</i>                                             | HID1 domain containing                                     |
| <i>RT1-S3</i>                                           | RT1 class Ib, locus S3                                     |
| <i>Arhgef18</i>                                         | Rho/Rac guanine nucleotide exchange factor 18              |
| <i>S100a10</i>                                          | S100 calcium binding protein A10                           |
| <i>Sh3bgrl</i>                                          | SH3 domain binding glutamate-rich protein like             |
| <i>Slc9a3r1</i>                                         | SLC9A3 regulator 1                                         |
| <i>Steap4</i>                                           | STEAP4 metalloredutase                                     |
| <i>Timp2</i>                                            | TIMP metalloproteinase inhibitor 2                         |
| <i>Acta2</i>                                            | actin, alpha 2, smooth muscle, aorta                       |
| <i>Actn1</i>                                            | actinin, alpha 1                                           |
| <i>Angpt1</i>                                           | angiopoietin 1                                             |
| <i>Anxa1</i>                                            | annexin A1                                                 |
| <i>Anxa2</i>                                            | annexin A2                                                 |
| <i>Ano1</i>                                             | anoctamin 1                                                |
| <i>Antxr1</i>                                           | anthrax toxin receptor 1                                   |
| <i>Apoa2</i>                                            | apolipoprotein A2                                          |
| <i>Apod</i>                                             | apolipoprotein D                                           |
| <i>ApoE</i>                                             | apolipoprotein E                                           |
| <i>Bgn</i>                                              | biglycan                                                   |
| <i>Bphl</i>                                             | biphenyl hydrolase like                                    |
| <i>Creb5</i>                                            | cAMP responsive element binding protein 5                  |
| <i>Cactin</i>                                           | cactin, spliceosome C complex subunit                      |
| <i>Cdh13</i>                                            | cadherin 13                                                |
| <i>Cdh2</i>                                             | cadherin 2                                                 |
| <i>Car2</i>                                             | carbonic anhydrase 2                                       |
| <i>Cpz</i>                                              | carboxypeptidase Z                                         |
| <i>Chmp4c</i>                                           | charged multivesicular body protein 4C                     |
| <i>Clic5</i>                                            | chloride intracellular channel 5                           |
| <i>F3</i>                                               | coagulation factor III, tissue factor                      |
| <i>Col1a2</i>                                           | collagen type I alpha 2 chain                              |
| <i>Col5a1</i>                                           | collagen type V alpha 1 chain                              |
| <i>Col5a3</i>                                           | collagen type V alpha 3 chain                              |
| <i>Col6a1</i>                                           | collagen type VI alpha 1 chain                             |
| <i>Col6a2</i>                                           | collagen type VI alpha 2 chain                             |
| <i>Col8a1</i>                                           | collagen type VIII alpha 1 chain                           |
| <i>Col12a1</i>                                          | collagen type XII alpha 1 chain                            |

|                  |                                                                               |
|------------------|-------------------------------------------------------------------------------|
| <i>Cfb</i>       | complement factor B                                                           |
| <i>Cfh</i>       | complement factor H                                                           |
| <i>Cryab</i>     | crystallin, alpha B                                                           |
| <i>Crispld2</i>  | cysteine-rich secretory protein LCCL domain containing 2                      |
| <i>Dsg2</i>      | desmoglein 2                                                                  |
| <i>Dnm3</i>      | dynammin 3                                                                    |
| <i>Entpd1</i>    | ectonucleoside triphosphate diphosphohydrolase 1                              |
| <i>Enpp3</i>     | ectonucleotide pyrophosphatase/phosphodiesterase 3                            |
| <i>Epcam</i>     | epithelial cell adhesion molecule                                             |
| <i>Eef1a1</i>    | eukaryotic translation elongation factor 1 alpha 1                            |
| <i>Fabp3</i>     | fatty acid binding protein 3                                                  |
| <i>Fabp4</i>     | fatty acid binding protein 4                                                  |
| <i>Fbn1</i>      | fibrillin 1                                                                   |
| <i>Fbln1</i>     | fibulin 1                                                                     |
| <i>Fbln5</i>     | fibulin 5                                                                     |
| <i>Lgals9</i>    | galectin 9                                                                    |
| <i>Gja1</i>      | gap junction protein, alpha 1                                                 |
| <i>Gfpt1</i>     | glutamine fructose-6-phosphate transaminase 1                                 |
| <i>Gstp1</i>     | glutathione S-transferase pi 1                                                |
| <i>Gpx3</i>      | glutathione peroxidase 3                                                      |
| <i>Gpc1</i>      | glypican 1                                                                    |
| <i>Golm1</i>     | golgi membrane protein 1                                                      |
| <i>Gas6</i>      | growth arrest specific 6                                                      |
| <i>Hist1h2ao</i> | histone cluster 1, H2ao                                                       |
| <i>Hist2h4</i>   | histone cluster 2, H4                                                         |
| <i>Islr</i>      | immunoglobulin superfamily containing leucine-rich repeat                     |
| <i>Insr</i>      | insulin receptor                                                              |
| <i>Igf2r</i>     | insulin-like growth factor 2 receptor                                         |
| <i>Igf2</i>      | insulin-like growth factor 2                                                  |
| <i>Itgav</i>     | integrin subunit alpha V                                                      |
| <i>Knl1</i>      | kinetochore scaffold 1                                                        |
| <i>Lamb1</i>     | laminin subunit beta 1                                                        |
| <i>Ltbp2</i>     | latent transforming growth factor beta binding protein 2                      |
| <i>Lrg1</i>      | leucine-rich alpha-2-glycoprotein 1                                           |
| <i>Lrrk2</i>     | leucine-rich repeat kinase 2                                                  |
| <i>Lcn2</i>      | lipocalin 2                                                                   |
| <i>Lpl</i>       | lipoprotein lipase                                                            |
| <i>Ly75</i>      | lymphocyte antigen 75                                                         |
| <i>Mgat5</i>     | Mannosyl (alpha-1,6-)-glycoprotein beta-1,6-N-acetyl-glucosaminyl-transferase |
| <i>Mgp</i>       | matrix Gla protein                                                            |
| <i>Mfge8</i>     | milk fat globule-EGF factor 8 protein                                         |
| <i>Mnda</i>      | myeloid cell nuclear differentiation antigen                                  |
| <i>Myof</i>      | myoferlin                                                                     |
| <i>Myo5a</i>     | myosin VA                                                                     |
| <i>Neb1</i>      | nebulette                                                                     |
| <i>Nid2</i>      | nidogen 2                                                                     |
| <i>Olr1</i>      | oxidized low density lipoprotein (lectin-like) receptor 1                     |
| <i>Ppic</i>      | peptidylprolyl isomerase C                                                    |
| <i>Ppl</i>       | periplakin                                                                    |
| <i>Plat</i>      | plasminogen activator, tissue type                                            |

|                 |                                                              |
|-----------------|--------------------------------------------------------------|
| <i>Pdgfrb</i>   | platelet derived growth factor receptor beta                 |
| <i>Plekha7</i>  | pleckstrin homology domain containing A7                     |
| <i>Plxdc2</i>   | plexin domain containing 2                                   |
| <i>Pabpc1</i>   | polyA binding protein, cytoplasmic 1                         |
| <i>Pcbp3</i>    | polyrC binding protein 3                                     |
| <i>Prnp</i>     | prion protein                                                |
| <i>Plod2</i>    | procollagen lysine, 2-oxoglutarate 5-dioxygenase 2           |
| <i>Prss23</i>   | protease, serine, 23                                         |
| <i>Prss8</i>    | protease, serine, 8                                          |
| <i>Prkar2b</i>  | protein kinase cAMP-dependent type 2 regulatory subunit beta |
| <i>Ptpn13</i>   | protein tyrosine phosphatase, non-receptor type 13           |
| <i>Plp2</i>     | proteolipid protein 2                                        |
| <i>Rhoq</i>     | ras homolog family member Q                                  |
| <i>Rhot2</i>    | ras homolog family member T2                                 |
| <i>Rtn4rl1</i>  | reticulon 4 receptor-like 1                                  |
| <i>Sfrp1</i>    | secreted frizzled-related protein 1                          |
| <i>Sema3c</i>   | semaphorin 3C                                                |
| <i>Sema3g</i>   | semaphorin 3G                                                |
| <i>Serpine1</i> | serpin family E member 1                                     |
| <i>Serping1</i> | serpin family G member 1                                     |
| <i>Serpini1</i> | serpin family I member 1                                     |
| <i>Smim1</i>    | small integral membrane protein 1                            |
| <i>Slc12a2</i>  | solute carrier family 12 member 2                            |
| <i>Slc25a25</i> | solute carrier family 25 member 25                           |
| <i>Slc4a4</i>   | solute carrier family 4 member 4                             |
| <i>Snx18</i>    | sorting nexin 18                                             |
| <i>Sat2</i>     | spermidine/spermine N1-acetyltransferase family member 2     |
| <i>Susd2</i>    | sushi domain containing 2                                    |
| <i>Syt7</i>     | synaptotagmin 7                                              |
| <i>Sdc4</i>     | syndecan 4                                                   |
| <i>Txnrd1</i>   | thioredoxin reductase 1                                      |
| <i>Tars</i>     | threonyl-tRNA synthetase                                     |
| <i>Thbs1</i>    | thrombospondin 1                                             |
| <i>Thsd7a</i>   | thrombospondin type 1 domain containing 7A                   |
| <i>Trim36</i>   | tripartite motif-containing 36                               |
| <i>Wars</i>     | tryptophanyl-tRNA synthetase                                 |
| <i>Tinagl1</i>  | tubulointerstitial nephritis antigen-like 1                  |
| <i>Ttyh3</i>    | tweety family member 3                                       |
| <i>Twsg1</i>    | twisted gastrulation BMP signaling modulator 1               |
| <i>Tpst2</i>    | tyrosylprotein sulfotransferase 2                            |
| <i>Vamp5</i>    | vesicle-associated membrane protein 5                        |
| <i>Vim</i>      | vimentin                                                     |
| <i>Vwa1</i>     | von Willebrand factor A domain containing 1                  |

**Table S6.** Top 25 up- & down-regulated genes in human cirrhotic CD32b+ LSECs.

| Gene symbol           | Fold-change | p-value | fdr   |
|-----------------------|-------------|---------|-------|
| <i>RHOD</i>           | 30.72       | 0.005   | 0.070 |
| <i>RBM14-RBM4</i>     | 25.84       | 0.002   | 0.056 |
| <i>NLRP6</i>          | 20.85       | 0.002   | 0.056 |
| <i>RP11-727F15.14</i> | 19.78       | 0.001   | 0.046 |
| <i>FN1</i>            | 19.18       | 0.005   | 0.072 |

|                      |         |       |       |
|----------------------|---------|-------|-------|
| <i>RARRES2</i>       | 17.40   | 0.006 | 0.074 |
| <i>MXRA8</i>         | 17.33   | 0.000 | 0.037 |
| <i>RMRP</i>          | 16.15   | 0.001 | 0.046 |
| <i>ISLR</i>          | 14.89   | 0.001 | 0.046 |
| <i>AC010970.2</i>    | 14.01   | 0.001 | 0.043 |
| <i>FCN1</i>          | 13.86   | 0.000 | 0.037 |
| <i>RNVU1-18</i>      | 13.62   | 0.008 | 0.079 |
| <i>RN7SL1</i>        | 13.25   | 0.001 | 0.043 |
| <i>JSRP1</i>         | 13.21   | 0.016 | 0.105 |
| <i>RPPH1</i>         | 12.50   | 0.001 | 0.048 |
| <i>RN7SL2</i>        | 12.31   | 0.002 | 0.050 |
| <i>SNORD3A</i>       | 12.08   | 0.000 | 0.037 |
| <i>CFD</i>           | 11.02   | 0.000 | 0.037 |
| <i>HK3</i>           | 10.90   | 0.003 | 0.059 |
| <i>CH507-513H4.5</i> | 10.82   | 0.002 | 0.050 |
| <i>IGF2</i>          | 10.69   | 0.000 | 0.037 |
| <i>IGFBP2</i>        | 10.30   | 0.003 | 0.062 |
| <i>LTB</i>           | 10.09   | 0.005 | 0.072 |
| <i>RN7SK</i>         | 10.06   | 0.007 | 0.078 |
| <i>TYMP</i>          | 9.88    | 0.000 | 0.037 |
| <i>MAPRE1</i>        | -33.80  | 0.009 | 0.084 |
| <i>CDK2AP1</i>       | -34.04  | 0.009 | 0.084 |
| <i>GPKOW</i>         | -34.55  | 0.007 | 0.079 |
| <i>NPL</i>           | -34.92  | 0.018 | 0.111 |
| <i>EHD4</i>          | -34.99  | 0.003 | 0.063 |
| <i>MBTPS1</i>        | -36.48  | 0.021 | 0.119 |
| <i>RDX</i>           | -37.46  | 0.005 | 0.071 |
| <i>MASP1</i>         | -40.57  | 0.004 | 0.069 |
| <i>UBE2G2</i>        | -41.71  | 0.001 | 0.047 |
| <i>ADI1</i>          | -45.06  | 0.007 | 0.078 |
| <i>ADGRL2</i>        | -45.88  | 0.019 | 0.115 |
| <i>PROCR</i>         | -46.41  | 0.000 | 0.037 |
| <i>MXRA7</i>         | -47.09  | 0.005 | 0.072 |
| <i>BTG1</i>          | -48.14  | 0.021 | 0.119 |
| <i>CLIC4</i>         | -48.63  | 0.001 | 0.046 |
| <i>ALDH2</i>         | -49.32  | 0.008 | 0.080 |
| <i>LGALS3</i>        | -49.53  | 0.004 | 0.069 |
| <i>TMEM165</i>       | -56.82  | 0.002 | 0.056 |
| <i>PRKAG1</i>        | -57.95  | 0.003 | 0.061 |
| <i>DCTN2</i>         | -61.63  | 0.009 | 0.083 |
| <i>COX7B</i>         | -66.25  | 0.005 | 0.071 |
| <i>PDCL</i>          | -67.30  | 0.001 | 0.043 |
| <i>ERG</i>           | -102.60 | 0.005 | 0.070 |
| <i>CAPZA2</i>        | -145.14 | 0.000 | 0.037 |
| <i>WDR61</i>         | -306.10 | 0.000 | 0.001 |

**Table S7.** Top common up- and down-regulated genes between human cirrhotic CD32b+ LSECs and CCl<sub>4</sub>-cirrhotic rat LSECs.

| Gene symbol | Fold-change |                  | p-value |                  | fdr    |                  |
|-------------|-------------|------------------|---------|------------------|--------|------------------|
|             | hLSECs      | CCl <sub>4</sub> | hLSECs  | CCl <sub>4</sub> | hLSECs | CCl <sub>4</sub> |
| <i>IGF2</i> | 10.69       | 3.95             | 0.000   | 0.000            | 0.037  | 0.000            |

|                 |        |       |       |       |       |       |
|-----------------|--------|-------|-------|-------|-------|-------|
| <i>TNFRSF4</i>  | 5.34   | 5.31  | 0.012 | 0.000 | 0.098 | 0.000 |
| <i>DUSP2</i>    | 4.62   | 2.40  | 0.001 | 0.022 | 0.046 | 0.037 |
| <i>TAGLN</i>    | 3.95   | 5.57  | 0.045 | 0.000 | 0.174 | 0.000 |
| <i>NCF1</i>     | 3.63   | 2.22  | 0.017 | 0.023 | 0.108 | 0.039 |
| <i>AEBP1</i>    | 3.06   | 2.84  | 0.016 | 0.000 | 0.106 | 0.001 |
| <i>SLAMF8</i>   | 2.87   | 2.82  | 0.011 | 0.001 | 0.093 | 0.004 |
| <i>EIF4EBP3</i> | 2.66   | 2.32  | 0.021 | 0.001 | 0.121 | 0.002 |
| <i>TACO1</i>    | -16.82 | -2.06 | 0.032 | 0.020 | 0.148 | 0.034 |
| <i>METTL7A</i>  | -18.17 | -2.04 | 0.005 | 0.000 | 0.071 | 0.001 |
| <i>ACO2</i>     | -18.36 | -1.51 | 0.043 | 0.002 | 0.170 | 0.005 |
| <i>CABLES1</i>  | -18.68 | -2.51 | 0.032 | 0.000 | 0.148 | 0.000 |
| <i>ATP5A1</i>   | -22.84 | -1.61 | 0.021 | 0.003 | 0.120 | 0.008 |
| <i>VPS11</i>    | -23.35 | -1.60 | 0.034 | 0.001 | 0.152 | 0.003 |
| <i>EXOC7</i>    | -25.60 | -1.92 | 0.009 | 0.000 | 0.084 | 0.001 |
| <i>ICMT</i>     | -25.98 | -2.16 | 0.008 | 0.000 | 0.083 | 0.000 |
| <i>ASAP3</i>    | -29.53 | -2.09 | 0.001 | 0.000 | 0.046 | 0.001 |
| <i>XPNPEP1</i>  | -29.90 | -1.65 | 0.014 | 0.001 | 0.102 | 0.004 |
| <i>DHDDS</i>    | -31.21 | -2.21 | 0.014 | 0.000 | 0.101 | 0.000 |
| <i>LDHB</i>     | -32.10 | -2.28 | 0.013 | 0.005 | 0.100 | 0.011 |
| <i>PGM5</i>     | -32.55 | -1.51 | 0.033 | 0.002 | 0.149 | 0.006 |
| <i>CDK2AP1</i>  | -34.04 | -1.50 | 0.009 | 0.001 | 0.084 | 0.004 |
| <i>UBE2G2</i>   | -41.71 | -1.59 | 0.001 | 0.003 | 0.047 | 0.007 |
| <i>ALDH2</i>    | -49.32 | -2.68 | 0.008 | 0.003 | 0.080 | 0.007 |
| <i>DCTN2</i>    | -61.63 | -1.54 | 0.009 | 0.002 | 0.083 | 0.005 |

**Table S8.** Common DEG between cirrhotic human and CCl<sub>4</sub>-cirrhotic rat LSECs defining extracellular exosomes components.

| Cellular Component: extracellular exosomes (GO:0070062) |                                                 |
|---------------------------------------------------------|-------------------------------------------------|
| Gene symbol                                             | Gene Name                                       |
| <i>AEBP1</i> *                                          | AE binding protein 1                            |
| <i>AHCY</i>                                             | adenosylhomocysteinase                          |
| <i>AKR1B1</i>                                           | aldo-keto reductase family 1 member B           |
| <i>ALDH2</i>                                            | aldehyde dehydrogenase 2 family (mitochondrial) |
| <i>ANXA11</i>                                           | annexin A11                                     |
| <i>AP2M1</i>                                            | adaptor-related protein complex 2, mu 1 subunit |
| <i>ARHGAP23</i>                                         | Rho GTPase activating protein 23                |
| <i>ARHGEF18</i>                                         | Rho/Rac guanine nucleotide exchange factor 18   |
| *                                                       | BCR, RhoGEF and GTPase activating protein       |
| <i>BCR</i>                                              | calcium activated nucleotidase 1                |
| <i>CANT1</i>                                            | collagen type IV alpha 2 chain                  |
| <i>COL4A2</i>                                           | copine 2                                        |
| <i>CPNE2</i>                                            | crystallin, lambda 1                            |
| <i>CRYL1</i>                                            | dystroglycan 1                                  |
| <i>DAG1</i>                                             | dynactin subunit 2                              |
| <i>DCTN2</i>                                            | damage-specific DNA binding protein 1           |
| <i>DDB1</i>                                             | dysferlin                                       |
| <i>DYSF</i>                                             | endothelin converting enzyme 1                  |
| <i>ECE1</i>                                             | eukaryotic translation elongation factor 2      |

|                   |                                                    |
|-------------------|----------------------------------------------------|
| <i>EEF2</i>       | eukaryotic translation initiation factor 5A        |
| <i>EIF5A</i>      | EPH receptor B4                                    |
| <i>EPHB4</i> *    | endothelial cell adhesion molecule                 |
| <i>ESAM</i>       | exostosin glycosyltransferase 2                    |
| <i>EXT2</i>       | polypeptide N-acetylgalactosaminyltransferase 2    |
| <i>GALNT2</i>     | glucosylceramidase beta                            |
| <i>GBA</i>        | galactosidase, beta 1                              |
| <i>GLB1</i>       | guanine nucleotide binding protein, alpha 11       |
| <i>GNA11</i>      | glutamic-oxaloacetic transaminase 2                |
| <i>GOT2</i>       | glucose-6-phosphate isomerase                      |
| <i>GPI</i>        | glutathione S-transferase kappa 1                  |
| <i>GSTK1</i>      | hyaluronoglucosaminidase 1                         |
| <i>HYAL1</i>      | hypoxia up-regulated 1                             |
| <i>HYOU1</i>      | insulin-like growth factor 2                       |
| <i>IGF2</i> *     | junction plakoglobin                               |
| <i>JUP</i>        | laminin subunit beta 2                             |
| <i>LAMB2</i>      | LIM and SH3 protein 1                              |
| <i>LASP1</i>      | lactate dehydrogenase B                            |
| <i>LDHB</i>       | methyltransferase like 7A                          |
| <i>METTL7A</i>    | multimerin 2                                       |
| <i>MMRN2</i>      | myosin 1C                                          |
| <i>MYO1C</i>      | nicastatin                                         |
| <i>NCSTN</i>      | Parkinsonism associated deglycase                  |
| <i>PARK7</i>      | protocadherin 12                                   |
| <i>PCDH12</i>     | protocadherin gamma subfamily C, 3                 |
| <i>PCDHGC3</i>    | phosphatidylethanolamine binding protein 1         |
| <i>PEBP1</i>      | prohibitin 2                                       |
| <i>PHB2</i>       | phospholipase C, delta 1                           |
| <i>PLCD1</i>      | peptidylprolyl isomerase B                         |
| <i>PPIB</i>       | polypyrimidine tract binding protein 1             |
| <i>PTBP1</i>      | pituitary tumor-transforming 1 interacting protein |
| <i>PTTG1IP</i>    | RAB5B, member RAS oncogene family                  |
| <i>RAB5B</i>      | RAB5C, member RAS oncogene family                  |
| <i>RAB5C</i>      | similar to RIKEN cDNA 0610037L13                   |
| <i>RGD155978</i>  | solute carrier family 25 member 25                 |
| 6                 | solute carrier family 44 member 2                  |
| <i>SLC25A25</i> * | serine and arginine rich splicing factor 2         |
| <i>SLC44A2</i>    | ST3 beta-galactoside alpha-2,3-sialyltransferase 4 |
| <i>SRSF2</i>      | stomatin                                           |
| <i>ST3GAL4</i>    | small ubiquitin-like modifier 3                    |
| <i>STOM</i>       | transglutaminase 2                                 |
| <i>SUMO3</i>      | tubulointerstitial nephritis antigen-like 1        |
| <i>TGM2</i>       | target of myb1 like 2 membrane trafficking protein |
| <i>TINAGL1</i> *  | torsin family 1, member A                          |
| <i>TOM1L2</i>     | torsin family 3, member A                          |
| <i>TOR1A</i>      | tumor protein p63 regulated 1-like                 |
| <i>TOR3A</i>      | tyrosylprotein sulfotransferase 2                  |

|                |                                             |
|----------------|---------------------------------------------|
| <i>TPRG1L</i>  | TNF receptor-associated protein 1           |
| <i>TPST2</i> * | tubulin, beta 6 class V                     |
| <i>TRAP1</i>   | thioredoxin domain containing 5             |
| <i>TUBB6</i>   | ubiquitin-like modifier activating enzyme 1 |
| <i>TXNDC5</i>  | X-prolyl aminopeptidase 1                   |
| <i>UBA1</i>    |                                             |
| <i>XPNPEP1</i> |                                             |

\* Denotes shared genes in 3 experiment models of CLD and human cells.

**Table S9.** Top common up- and down-regulated genes between human cirrhotic CD32b+ LSECs and TAA- cirrhotic rat LSECs.

| Gene symbol     | Fold-change |       | p-value |       | fdr    |       |
|-----------------|-------------|-------|---------|-------|--------|-------|
|                 | hLSECs      | TAA   | hLSECs  | TAA   | hLSECs | TAA   |
| <i>FN1</i>      | 19.18       | 10.67 | 0.005   | 0.000 | 0.072  | 0.000 |
| <i>RARRES2</i>  | 17.40       | 4.48  | 0.006   | 0.000 | 0.074  | 0.000 |
| <i>MXRA8</i>    | 17.33       | 1.78  | 0.000   | 0.001 | 0.037  | 0.006 |
| <i>IGF2</i>     | 10.69       | 3.60  | 0.000   | 0.000 | 0.037  | 0.001 |
| <i>NNMT</i>     | 9.35        | 3.67  | 0.001   | 0.001 | 0.043  | 0.004 |
| <i>DACT3</i>    | 9.29        | 4.84  | 0.000   | 0.000 | 0.013  | 0.001 |
| <i>LGALS1</i>   | 7.56        | 8.94  | 0.000   | 0.000 | 0.037  | 0.000 |
| <i>AVPR2</i>    | 7.28        | 1.88  | 0.005   | 0.005 | 0.070  | 0.014 |
| <i>SERPINF2</i> | 6.45        | 3.34  | 0.013   | 0.000 | 0.099  | 0.002 |
| <i>SPON2</i>    | 6.02        | 3.69  | 0.002   | 0.000 | 0.057  | 0.001 |
| <i>HAS1</i>     | 5.91        | 5.39  | 0.000   | 0.000 | 0.037  | 0.000 |
| <i>TNFRSF4</i>  | 5.34        | 2.23  | 0.012   | 0.001 | 0.098  | 0.004 |
| <i>BOK</i>      | 5.24        | 3.47  | 0.007   | 0.000 | 0.078  | 0.000 |
| <i>CLEC1B</i>   | -4.69       | -2.13 | 0.015   | 0.000 | 0.104  | 0.000 |
| <i>LGMN</i>     | -4.70       | -1.58 | 0.003   | 0.000 | 0.063  | 0.000 |
| <i>PLPP3</i>    | -5.15       | -1.58 | 0.037   | 0.000 | 0.157  | 0.001 |
| <i>IRF2BP2</i>  | -5.60       | -1.55 | 0.005   | 0.010 | 0.071  | 0.025 |
| <i>JADE2</i>    | -7.13       | -1.84 | 0.007   | 0.000 | 0.076  | 0.001 |
| <i>GIMAP6</i>   | -9.97       | -2.11 | 0.000   | 0.000 | 0.037  | 0.000 |
| <i>EHD3</i>     | -10.55      | -1.99 | 0.001   | 0.001 | 0.043  | 0.003 |
| <i>TPST2</i>    | -12.15      | -1.54 | 0.000   | 0.000 | 0.037  | 0.000 |
| <i>SLC31A2</i>  | -14.02      | -2.38 | 0.034   | 0.000 | 0.152  | 0.000 |
| <i>TACO1</i>    | -16.82      | -2.18 | 0.032   | 0.010 | 0.148  | 0.024 |
| <i>CABLES1</i>  | -18.68      | -2.51 | 0.032   | 0.000 | 0.148  | 0.000 |
| <i>MID1</i>     | -18.89      | -1.88 | 0.033   | 0.000 | 0.150  | 0.000 |

**Table S10.** Common DEG between cirrhotic human and TAA-cirrhotic rat LSECs defining extra-cellular exosomes components.

| Cellular Component: extracellular exosomes (GO:0070062) |                                               |
|---------------------------------------------------------|-----------------------------------------------|
| Gene symbol                                             | Gene Name                                     |
| <i>ADAM15</i>                                           | ADAM metalloproteinase domain 15              |
| <i>AEBP1</i> *                                          | AE binding protein 1                          |
| <i>APRT</i>                                             | adenine phosphoribosyl transferase            |
| <i>ARHGEF18</i> *                                       | Rho/Rac guanine nucleotide exchange factor 18 |
| <i>CANT1</i>                                            | calcium activated nucleotidase 1              |
| <i>CLEC14A</i>                                          | C-type lectin domain family 14, member A      |

|                   |                                                                    |
|-------------------|--------------------------------------------------------------------|
| <i>DDAH2</i>      | dimethylarginine dimethylaminohydrolase 2                          |
| <i>EPHB4</i> *    | EPH receptor B4                                                    |
| <i>FLNA</i>       | filamin A                                                          |
| <i>FN1</i>        | fibronectin 1                                                      |
| <i>GALK1</i>      | galactokinase 1                                                    |
| <i>IGF2</i> *     | insulin-like growth factor 2                                       |
| <i>JADE2</i>      | jade family PHD finger 2                                           |
| <i>KRT18</i>      | keratin 18                                                         |
| <i>LGALS1</i>     | galectin 1                                                         |
| <i>LGMN</i>       | legumain                                                           |
| <i>LTBP4</i>      | latent transforming growth factor beta binding protein 4           |
| <i>MAN1C1</i>     | mannosidase, alpha, class 1C, member 1                             |
| <i>MXRA8</i>      | matrix remodeling associated 8                                     |
| <i>PAFAH1B3</i>   | platelet-activating factor acetylhydrolase 1b, catalytic subunit 3 |
| <i>PDLIM2</i>     | PDZ and LIM domain 2                                               |
| <i>PLPP3</i>      | phospholipid phosphatase 3                                         |
| <i>RARRES2</i>    | retinoic acid receptor responder 2                                 |
| <i>S100A6</i>     | S100 calcium binding protein A6                                    |
| <i>SERPINF2</i>   | serpin family F member 2                                           |
| <i>SLC1A5</i>     | solute carrier family 1 member 5                                   |
| <i>SLC25A25</i> * | solute carrier family 25 member 25                                 |
| <i>SLC7A8</i>     | solute carrier family 7 member 8                                   |
| <i>SNED1</i>      | sushi, nidogen and EGF-like domains 1                              |
| <i>SPON2</i>      | spondin 2                                                          |
| <i>TINAGL1</i> *  | tubulointerstitial nephritis antigen-like 1                        |
| <i>TPST2</i> *    | tyrosylprotein sulfotransferase 2                                  |
| <i>VASN</i>       | vasorin                                                            |
| <i>VWF</i>        | von Willebrand factor                                              |

\* Denotes shared genes in 3 experiment models of CLD and human cells.

**Table S11.** Top common up- and down-regulated genes between human cirrhotic CD32b+ LSECs and cBDL- cirrhotic rat LSECs.

| Gene symbol    | Fold-change |        | p-value |       | fdr    |       |
|----------------|-------------|--------|---------|-------|--------|-------|
|                | hLSECs      | cBDL   | hLSECs  | cBDL  | hLSECs | cBDL  |
| <i>FN1</i>     | 19.18       | 28.322 | 0.01    | 0.000 | 0.072  | 0.000 |
| <i>CFD</i>     | 11.02       | 5.866  | 0.00    | 0.007 | 0.037  | 0.018 |
| <i>HK3</i>     | 10.90       | 17.161 | 0.00    | 0.001 | 0.059  | 0.003 |
| <i>IGF2</i>    | 10.69       | 2.018  | 0.00    | 0.027 | 0.037  | 0.052 |
| <i>CITED4</i>  | 9.06        | 2.182  | 0.00    | 0.007 | 0.046  | 0.019 |
| <i>CORO1A</i>  | 9.05        | 9.720  | 0.00    | 0.000 | 0.050  | 0.002 |
| <i>SLC16A3</i> | 8.63        | 11.936 | 0.00    | 0.000 | 0.013  | 0.000 |
| <i>LGALS1</i>  | 7.56        | 30.311 | 0.00    | 0.000 | 0.037  | 0.000 |
| <i>SYTL1</i>   | 7.40        | 1.815  | 0.00    | 0.004 | 0.061  | 0.011 |
| <i>HCST</i>    | 7.32        | 4.756  | 0.00    | 0.000 | 0.041  | 0.001 |
| <i>S100A6</i>  | 6.94        | 18.036 | 0.00    | 0.000 | 0.037  | 0.000 |
| <i>DOK2</i>    | 6.84        | 4.501  | 0.00    | 0.001 | 0.037  | 0.003 |
| <i>LRRC25</i>  | 6.53        | 11.372 | 0.01    | 0.001 | 0.079  | 0.003 |
| <i>S1PR4</i>   | 6.48        | 7.078  | 0.01    | 0.000 | 0.082  | 0.001 |
| <i>PYCARD</i>  | 6.11        | 5.607  | 0.00    | 0.001 | 0.045  | 0.004 |



|                |         |        |      |       |       |       |
|----------------|---------|--------|------|-------|-------|-------|
| <i>TINAGL1</i> | -2.23   | -3.530 | 0.03 | 0.000 | 0.131 | 0.001 |
| <i>BACE2</i>   | -2.29   | -2.159 | 0.01 | 0.002 | 0.080 | 0.008 |
| <i>GIMAP5</i>  | -2.30   | -2.669 | 0.02 | 0.000 | 0.125 | 0.000 |
| <i>MTSS1L</i>  | -2.33   | -2.140 | 0.01 | 0.028 | 0.078 | 0.054 |
| <i>TBXA2R</i>  | -2.34   | -2.656 | 0.04 | 0.000 | 0.156 | 0.001 |
| <i>BCR</i>     | -2.34   | -2.005 | 0.01 | 0.018 | 0.100 | 0.038 |
| <i>TNS2</i>    | -2.42   | -2.618 | 0.01 | 0.000 | 0.076 | 0.001 |
| <i>MASP1</i>   | -40.57  | -3.426 | 0.00 | 0.008 | 0.069 | 0.020 |
| <i>ADI1</i>    | -45.06  | -2.032 | 0.01 | 0.025 | 0.078 | 0.049 |
| <i>ERG</i>     | -102.60 | -1.876 | 0.00 | 0.007 | 0.070 | 0.019 |

**Table S12.** Common DEG between cirrhotic human and cBDL-cirrhotic rat LSECs defining extra-cellular exosomes components.

| Cellular Component: extracellular exosomes (GO:0070062) |                                                                        |
|---------------------------------------------------------|------------------------------------------------------------------------|
| Gene symbol                                             | Gene Name                                                              |
| <i>ADAM15</i>                                           | ADAM metalloproteinase domain 15                                       |
| <i>AEBP1</i> *                                          | AE binding protein 1                                                   |
| <i>ALDOA</i>                                            | aldolase, fructose-bisphosphate A                                      |
| <i>APRT</i>                                             | adenine phosphoribosyltransferase                                      |
| <i>ARHGAP23</i>                                         | Rho GTPase activating protein 23                                       |
| <i>ARHGEF18</i> *                                       | Rho/Rac guanine nucleotide exchange factor 18                          |
| <i>ARRDC1</i>                                           | arrestin domain containing 1                                           |
| <i>BCR</i>                                              | BCR, RhoGEF and GTPase activating protein                              |
| <i>BEND7</i>                                            | BEN domain containing 7                                                |
| <i>C1QA</i>                                             | complement C1q A chain                                                 |
| <i>CAPG</i>                                             | capping actin protein, gelsolin like                                   |
| <i>CD37</i>                                             | CD37 molecule                                                          |
| <i>CFD</i>                                              | complement factor D                                                    |
| <i>CLEC14A</i>                                          | C-type lectin domain family 14 member A                                |
| <i>CORO1A</i>                                           | coronin 1A                                                             |
| <i>CRYL1</i>                                            | crystallin lambda 1                                                    |
| <i>CSK</i>                                              | c-src tyrosine kinase                                                  |
| <i>CTSL</i>                                             | cathepsin L                                                            |
| <i>DNPH1</i>                                            | 2'-deoxynucleoside 5'-phosphate N-hydrolase 1                          |
| <i>EPHB4</i> *                                          | EPH receptor B4                                                        |
| <i>FERMT3</i>                                           | fermitin family member 3                                               |
| <i>FGR</i>                                              | FGR proto-oncogene, Src family tyrosine kinase                         |
| <i>FLNA</i>                                             | filamin A                                                              |
| <i>FN1</i>                                              | fibronectin 1                                                          |
| <i>GALK1</i>                                            | galactokinase 1                                                        |
| <i>GRN</i>                                              | granulin precursor                                                     |
| <i>GSTK1</i>                                            | glutathione S-transferase kappa 1                                      |
| <i>H2AFJ</i>                                            | H2A histone family member J                                            |
| <i>IGF2</i> *                                           | insulin like growth factor 2                                           |
| <i>LGALS1</i>                                           | galectin 1                                                             |
| <i>LSP1</i>                                             | lymphocyte-specific protein 1                                          |
| <i>MAN1C1</i>                                           | mannosidase alpha class 1C member 1                                    |
| <i>METRNL</i>                                           | meteorin like, glial cell differentiation regulator                    |
| <i>MIF</i>                                              | macrophage migration inhibitory factor glycosylation-inhibiting factor |
| <i>MMRN2</i>                                            | multimerin 2                                                           |

|                  |                                                                   |
|------------------|-------------------------------------------------------------------|
| <i>MYO1G</i>     | myosin IG                                                         |
| <i>NT5C</i>      | 5', 3'-nucleotidase, cytosolic                                    |
| <i>NUDT1</i>     | nudix hydrolase 1                                                 |
| <i>NUDT14</i>    | nudix hydrolase 14                                                |
| <i>PAFAH1B3</i>  | platelet activating factor acetylhydrolase 1b catalytic subunit 3 |
| <i>PCDH12</i>    | protocadherin 12                                                  |
| <i>PDLIM2</i>    | PDZ and LIM domain 2                                              |
| <i>PGLS</i>      | 6-phosphogluconolactonase                                         |
| <i>PLPP3</i>     | phospholipid phosphatase 3                                        |
| <i>PRDX5</i>     | peroxiredoxin 5                                                   |
| <i>RASAL3</i>    | RAS protein activator like 3                                      |
| <i>RHOG</i>      | ras homolog family member G                                       |
| <i>RNH1</i>      | ribonuclease/angiogenin inhibitor 1                               |
| <i>RPL37A</i>    | ribosomal protein L37a                                            |
| <i>RPLP1</i>     | ribosomal protein lateral stalk subunit P1                        |
| <i>RPLP2</i>     | ribosomal protein lateral stalk subunit P2                        |
| <i>RPS10</i>     | ribosomal protein S10                                             |
| <i>RPS14</i>     | ribosomal protein S14                                             |
| <i>RPS16</i>     | ribosomal protein S16                                             |
| <i>RPS19</i>     | ribosomal protein S19                                             |
| <i>RPS2</i>      | ribosomal protein S2                                              |
| <i>RPS28</i>     | ribosomal protein S28                                             |
| <i>RPS29</i>     | ribosomal protein S29                                             |
| <i>RPS3</i>      | ribosomal protein S3                                              |
| <i>RPS5</i>      | ribosomal protein S5                                              |
| <i>RPS9</i>      | ribosomal protein S9                                              |
| <i>S100A4</i>    | S100 calcium binding protein A4                                   |
| <i>S100A6</i>    | S100 calcium binding protein A6                                   |
| <i>SH3BGR13</i>  | SH3 domain binding glutamate rich protein like 3                  |
| <i>SLC1A5</i>    | solute carrier family 1 member 5                                  |
| <i>SLC25A25</i>  | solute carrier family 25 member 25                                |
| <i>SLC2A1</i>    | solute carrier family 2 member 1                                  |
| <i>SNED1</i>     | sushi, nidogen and EGF like domains 1                             |
| <i>ST14</i>      | suppression of tumorigenicity 14                                  |
| <i>ST6GAL1</i>   | ST6 beta-galactoside alpha-2,6-sialyltransferase 1                |
| <i>STOM</i>      | stomatin                                                          |
| <i>SYNGR2</i>    | synaptogyrin 2                                                    |
| <i>SYTL1</i>     | synaptotagmin like 1                                              |
| <i>TINAGL1 *</i> | tubulointerstitial nephritis antigen like 1                       |
| <i>TOM1L2</i>    | target of myb1 like 2 membrane trafficking protein                |
| <i>TPST2 *</i>   | tyrosylprotein sulfotransferase 2                                 |
| <i>TSPO</i>      | translocator protein                                              |
| <i>TWF2</i>      | twinfilin actin binding protein 2                                 |
| <i>VWF</i>       | von Willebrand factor                                             |

\* Denotes shared genes in 3 experiment models of CLD and human cells.

**Table S13.** Top 25 up- & down-regulated genes in CCl<sub>4</sub>-cirrhotic rat LSECs during CLD progression.

| Gene sym-<br>bol | Fold-change |          |                | p-value |               |                | fdr   |               |                |
|------------------|-------------|----------|----------------|---------|---------------|----------------|-------|---------------|----------------|
|                  | Acute       | Fibrosis | Cirrho-<br>sis | Acute   | Fibro-<br>sis | Cirrho-<br>sis | Acute | Fibro-<br>sis | Cirrho-<br>sis |

|                   |         |         |        |       |       |       |       |       |       |
|-------------------|---------|---------|--------|-------|-------|-------|-------|-------|-------|
| <i>Ccl21</i>      | -8.75   | -3.83   | 335.00 | 0.000 | 0.004 | 0.000 | 0.000 | 0.007 | 0.000 |
| <i>Clic5</i>      | -9.43   | -3.39   | 26.83  | 0.000 | 0.007 | 0.000 | 0.000 | 0.011 | 0.000 |
| <i>Igsf3</i>      | 23.98   | 20.65   | 25.93  | 0.000 | 0.000 | 0.000 | 0.000 | 0.000 | 0.000 |
| <i>Flnc</i>       | 7.83    | 40.54   | 22.28  | 0.000 | 0.000 | 0.000 | 0.000 | 0.000 | 0.000 |
| <i>Mmp12</i>      | 34.02   | 20.30   | 20.30  | 0.000 | 0.000 | 0.000 | 0.000 | 0.000 | 0.000 |
| <i>Cyp1a1</i>     | 548.77  | 137.28  | 19.48  | 0.000 | 0.000 | 0.000 | 0.000 | 0.000 | 0.002 |
| <i>Lpl</i>        | 9.55    | 3.12    | 19.44  | 0.002 | 0.003 | 0.000 | 0.004 | 0.004 | 0.000 |
| <i>Casc4</i>      | 25.35   | 21.27   | 19.24  | 0.000 | 0.000 | 0.000 | 0.000 | 0.000 | 0.000 |
| <i>Il6</i>        | 2.68    | 4.19    | 19.12  | 0.031 | 0.001 | 0.000 | 0.042 | 0.001 | 0.000 |
| <i>Prss23</i>     | 6.06    | 12.33   | 17.82  | 0.000 | 0.000 | 0.000 | 0.000 | 0.000 | 0.000 |
| <i>Ednrb</i>      | -2.74   | -1.52   | 15.82  | 0.000 | 0.036 | 0.000 | 0.000 | 0.049 | 0.000 |
| <i>Apba2</i>      | 2.59    | 3.51    | 15.81  | 0.033 | 0.013 | 0.000 | 0.043 | 0.019 | 0.000 |
| <i>Plod2</i>      | 5.43    | 22.54   | 15.26  | 0.000 | 0.000 | 0.000 | 0.000 | 0.000 | 0.000 |
| <i>Col12a1</i>    | 4.62    | 22.32   | 14.73  | 0.001 | 0.000 | 0.000 | 0.001 | 0.000 | 0.000 |
| <i>Tll1</i>       | 177.51  | 287.98  | 14.61  | 0.000 | 0.000 | 0.000 | 0.000 | 0.000 | 0.000 |
| <i>Cyp1b1</i>     | 219.96  | 163.01  | 13.79  | 0.000 | 0.000 | 0.000 | 0.000 | 0.000 | 0.000 |
| <i>Dclk1</i>      | 10.46   | 68.72   | 13.18  | 0.000 | 0.000 | 0.000 | 0.000 | 0.000 | 0.000 |
| <i>Abcc9</i>      | 25.00   | 25.88   | 13.04  | 0.000 | 0.000 | 0.000 | 0.000 | 0.000 | 0.000 |
| <i>Lox</i>        | 3.44    | 75.16   | 12.21  | 0.007 | 0.000 | 0.000 | 0.011 | 0.000 | 0.000 |
| <i>Il1rl1</i>     | 3.19    | 14.57   | 8.85   | 0.019 | 0.000 | 0.000 | 0.026 | 0.000 | 0.000 |
| <i>Vash2</i>      | 25.41   | 42.64   | 8.75   | 0.000 | 0.000 | 0.000 | 0.000 | 0.000 | 0.000 |
| <i>Igfbp5</i>     | -9.59   | -2.61   | 8.58   | 0.000 | 0.002 | 0.000 | 0.000 | 0.004 | 0.000 |
| <i>Vegfd</i>      | 2.42    | 3.59    | 8.12   | 0.008 | 0.000 | 0.000 | 0.012 | 0.000 | 0.000 |
| <i>Sulf1</i>      | 3.48    | 14.99   | 7.96   | 0.001 | 0.000 | 0.000 | 0.002 | 0.000 | 0.000 |
| <i>Col14a1</i>    | -16.89  | -3.36   | 7.86   | 0.000 | 0.002 | 0.000 | 0.000 | 0.004 | 0.000 |
| <i>Islr</i>       | -665.67 | -262.01 | -5.00  | 0.000 | 0.000 | 0.000 | 0.000 | 0.000 | 0.000 |
| <i>Gcat</i>       | -3.74   | -5.53   | -5.04  | 0.003 | 0.000 | 0.000 | 0.004 | 0.001 | 0.001 |
| <i>Dcxr</i>       | -48.04  | -39.36  | -5.10  | 0.000 | 0.000 | 0.000 | 0.000 | 0.000 | 0.002 |
| <i>Gpr153</i>     | -8.15   | -10.47  | -5.13  | 0.000 | 0.000 | 0.000 | 0.000 | 0.000 | 0.000 |
| <i>Akr7a2</i>     | -8.27   | -10.71  | -5.28  | 0.000 | 0.000 | 0.000 | 0.000 | 0.000 | 0.000 |
| <i>Hoxb5</i>      | -3.70   | -8.03   | -5.31  | 0.000 | 0.000 | 0.000 | 0.000 | 0.000 | 0.000 |
| <i>Cpne5</i>      | -31.19  | -23.22  | -5.33  | 0.000 | 0.000 | 0.000 | 0.000 | 0.000 | 0.000 |
| <i>Igdcc3</i>     | -3.26   | -5.43   | -5.33  | 0.000 | 0.000 | 0.001 | 0.001 | 0.000 | 0.004 |
| <i>Kcp</i>        | -31.78  | -21.31  | -5.43  | 0.000 | 0.000 | 0.000 | 0.000 | 0.000 | 0.000 |
| <i>Slco2b1</i>    | -169.94 | -60.17  | -5.48  | 0.000 | 0.000 | 0.000 | 0.000 | 0.000 | 0.000 |
| <i>Slc22a8</i>    | -65.84  | -11.25  | -5.67  | 0.000 | 0.001 | 0.006 | 0.000 | 0.002 | 0.013 |
| <i>Gpt</i>        | -14.68  | -9.95   | -6.35  | 0.000 | 0.000 | 0.001 | 0.000 | 0.001 | 0.003 |
| <i>Tmem132e</i>   | -10.29  | -17.11  | -6.61  | 0.000 | 0.000 | 0.000 | 0.000 | 0.000 | 0.000 |
| <i>Jph3</i>       | -21.00  | -32.14  | -6.62  | 0.000 | 0.000 | 0.000 | 0.000 | 0.000 | 0.000 |
| <i>Cib2</i>       | -8.61   | -8.09   | -6.93  | 0.000 | 0.000 | 0.000 | 0.000 | 0.000 | 0.000 |
| <i>Ptpru</i>      | -55.16  | -75.61  | -7.48  | 0.000 | 0.000 | 0.000 | 0.000 | 0.000 | 0.000 |
| <i>RGD1307603</i> | -378.74 | -47.08  | -7.81  | 0.000 | 0.000 | 0.003 | 0.000 | 0.000 | 0.007 |
| <i>Hal</i>        | -279.97 | -65.99  | -8.02  | 0.000 | 0.000 | 0.002 | 0.000 | 0.000 | 0.005 |
| <i>Cabp2</i>      | -365.01 | -68.23  | -8.22  | 0.000 | 0.000 | 0.001 | 0.000 | 0.000 | 0.003 |
| <i>Igf2bp2</i>    | 10.48   | 6.81    | -8.89  | 0.000 | 0.000 | 0.000 | 0.000 | 0.000 | 0.000 |
| <i>Hba1</i>       | -141.44 | -16.15  | -9.48  | 0.000 | 0.012 | 0.034 | 0.001 | 0.017 | 0.055 |
| <i>Cntfr</i>      | -19.40  | -35.32  | -9.54  | 0.000 | 0.000 | 0.000 | 0.000 | 0.000 | 0.000 |
| <i>Stac3</i>      | -97.79  | -42.77  | -16.10 | 0.000 | 0.000 | 0.001 | 0.000 | 0.000 | 0.003 |
| <i>Grik4</i>      | -3.48   | -5.87   | -18.73 | 0.000 | 0.000 | 0.000 | 0.001 | 0.000 | 0.000 |
| <i>Ihh</i>        | -60.27  | -65.78  | -31.75 | 0.000 | 0.000 | 0.000 | 0.000 | 0.000 | 0.000 |

**Table S14.** Genes related to molecular complexes and membrane receptors necessary for EVs biogenesis and exocytosis. (Table A relative to healthy, Table B relative to the previous CLD stage).

A)

| Gene<br>Symbol  | Fold-change |               |           | p-value |          |                | fdr   |               |                |
|-----------------|-------------|---------------|-----------|---------|----------|----------------|-------|---------------|----------------|
|                 | Acute       | Fibro-<br>sis | Cirrhosis | Acute   | Fibrosis | Cirrho-<br>sis | Acute | Fibro-<br>sis | Cirrho-<br>sis |
| <i>Vps28</i>    | -2.73       | -3.18         | -2.12     | 0.000   | 0.000    | 0.000          | 0.000 | 0.000         | 0.001          |
| <i>Mvb12a</i>   | -3.51       | -3.98         | -2.66     | 0.000   | 0.000    | 0.000          | 0.000 | 0.000         | 0.000          |
| <i>Mvb12b</i>   | -1.95       | -2.46         | -1.74     | 0.000   | 0.000    | 0.000          | 0.000 | 0.000         | 0.001          |
| <i>Ap2s1</i>    | -4.95       | -5.67         | -2.91     | 0.000   | 0.000    | 0.000          | 0.000 | 0.000         | 0.000          |
| <i>Flot2</i>    | -5.07       | -6.37         | -2.58     | 0.000   | 0.000    | 0.000          | 0.000 | 0.000         | 0.000          |
| <i>Cd9</i>      | -7.63       | -4.31         | 2.02      | 0.000   | 0.000    | 0.020          | 0.000 | 0.000         | 0.035          |
| <i>Cd81</i>     | -9.56       | -10.07        | -2.18     | 0.000   | 0.000    | 0.000          | 0.000 | 0.000         | 0.000          |
| <i>Rab3a</i>    | -24.78      | -8.24         | -1.44     | 0.000   | 0.000    | 0.030          | 0.000 | 0.000         | 0.049          |
| <i>Sphk1</i>    | -96.52      | -25.51        | -2.10     | 0.000   | 0.000    | 0.060          | 0.000 | 0.000         | 0.089          |
| <i>S1pr3</i>    | -2.41       | 1.42          | 4.15      | 0.040   | 0.202    | 0.000          | 0.053 | 0.237         | 0.000          |
| <i>S1pr4</i>    | -59.61      | -15.87        | -2.36     | 0.000   | 0.000    | 0.057          | 0.000 | 0.000         | 0.086          |
| <i>Cers4</i>    | -2.54       | -3.85         | 1.15      | 0.000   | 0.000    | 0.393          | 0.000 | 0.000         | 0.456          |
| <i>Tsg101</i>   | 1.82        | 1.58          | 1.15      | 0.000   | 0.000    | 0.101          | 0.000 | 0.000         | 0.139          |
| <i>Vps36</i>    | 4.16        | 3.49          | 2.62      | 0.000   | 0.000    | 0.000          | 0.000 | 0.000         | 0.001          |
| <i>Chmp4bl1</i> | 1.44        | 1.81          | -1.01     | 0.016   | 0.000    | 0.945          | 0.023 | 0.000         | 0.954          |
| <i>Vps4a</i>    | 1.93        | 1.63          | 1.03      | 0.000   | 0.001    | 0.752          | 0.000 | 0.002         | 0.791          |
| <i>Cers6</i>    | 12.93       | 7.49          | 1.76      | 0.000   | 0.000    | 0.044          | 0.000 | 0.000         | 0.069          |

B)

| Gene<br>Symbol  | Fold-change |          |                | p-value |               |           | fdr   |               |                |
|-----------------|-------------|----------|----------------|---------|---------------|-----------|-------|---------------|----------------|
|                 | Acute       | Fibrosis | Cirrho-<br>sis | Acute   | Fibro-<br>sis | Cirrhosis | Acute | Fibro-<br>sis | Cirrho-<br>sis |
| <i>Vps28</i>    | -2.73       | -1.16    | 1.50           | 0.000   | 0.051         | 0.000     | 0.000 | 0.132         | 0.000          |
| <i>Mvb12a</i>   | -3.51       | -1.14    | 1.49           | 0.000   | 0.058         | 0.000     | 0.000 | 0.143         | 0.001          |
| <i>Mvb12b</i>   | -1.95       | -1.26    | 1.41           | 0.000   | 0.006         | 0.000     | 0.000 | 0.033         | 0.000          |
| <i>Ap2s1</i>    | -4.95       | -1.14    | 1.95           | 0.000   | 0.046         | 0.000     | 0.000 | 0.123         | 0.000          |
| <i>Flot2</i>    | -5.07       | -1.26    | 2.47           | 0.000   | 0.005         | 0.000     | 0.000 | 0.032         | 0.000          |
| <i>Cd9</i>      | -7.63       | 1.77     | 8.69           | 0.000   | 0.028         | 0.000     | 0.000 | 0.088         | 0.000          |
| <i>Cd81</i>     | -9.56       | -1.05    | 4.61           | 0.000   | 0.339         | 0.000     | 0.000 | 0.485         | 0.000          |
| <i>Rab3a</i>    | -24.78      | 3.01     | 5.72           | 0.000   | 0.021         | 0.000     | 0.000 | 0.072         | 0.000          |
| <i>Sphk1</i>    | -96.52      | 3.78     | 12.15          | 0.000   | 0.003         | 0.000     | 0.000 | 0.022         | 0.000          |
| <i>S1pr3</i>    | -2.41       | 3.41     | 2.93           | 0.040   | 0.024         | 0.002     | 0.053 | 0.079         | 0.002          |
| <i>S1pr4</i>    | -59.61      | 3.76     | 6.72           | 0.000   | 0.006         | 0.000     | 0.000 | 0.033         | 0.000          |
| <i>Cers4</i>    | -2.54       | -1.52    | 4.42           | 0.000   | 0.001         | 0.000     | 0.000 | 0.010         | 0.000          |
| <i>Tsg101</i>   | 1.82        | -1.15    | -1.37          | 0.000   | 0.004         | 0.000     | 0.000 | 0.028         | 0.000          |
| <i>Vps36</i>    | 4.16        | -1.19    | -1.33          | 0.000   | 0.004         | 0.000     | 0.000 | 0.027         | 0.000          |
| <i>Chmp4bl1</i> | 1.44        | 1.26     | -1.83          | 0.016   | 0.061         | 0.000     | 0.023 | 0.147         | 0.000          |
| <i>Vps4a</i>    | 1.93        | -1.19    | -1.57          | 0.000   | 0.007         | 0.000     | 0.000 | 0.038         | 0.000          |
| <i>Cers6</i>    | 12.93       | -1.73    | -4.25          | 0.000   | 0.000         | 0.000     | 0.000 | 0.004         | 0.000          |

**Table S15.** Top up- & down-regulated proteins in CCl<sub>4</sub>-cirrhotic rat LSECs sEVs during CLD progression. (Table A relative to Healthy, Table B relative to the previous CLD stage).

A)

| Gene symbol | Fold-change |          |           | p-value |          |           |
|-------------|-------------|----------|-----------|---------|----------|-----------|
|             | Acute       | Fibrosis | Cirrhosis | Acute   | Fibrosis | Cirrhosis |
| TPM1        | 1.772       | 1.777    | 4.964     | 0.535   | 0.417    | 0.098     |
| TPM2        | 1.362       | -1.830   | 2.070     | 0.394   | 0.349    | 0.351     |
| ANXA1       | -1.935      | -1.337   | 2.309     | 0.139   | 0.500    | 0.153     |
| PURA        | -5.044      | -4.919   | -1.619    | 0.238   | 0.219    | 0.646     |
| C1QC        | -4.489      | -5.981   | -2.344    | 0.050   | 0.077    | 0.241     |
| PGRMC2      | -2.576      | -2.878   | -2.158    | 0.243   | 0.365    | 0.235     |
| TTC39C      | -2.511      | -3.536   | -1.972    | 0.417   | 0.174    | 0.250     |
| SSBP1       | -33.94      | -52.71   | -30.51    | 0.001   | 0.000    | 0.001     |
| MRPL14      | 1.742       | 2.044    | 2.447     | 0.484   | 0.301    | 0.257     |
| IGF2        | 2.758       | 3.766    | 2.155     | 0.028   | 0.036    | 0.129     |
| H1f0        | 2.100       | 3.067    | 2.169     | 0.406   | 0.121    | 0.228     |
| HNRPA1      | 2.202       | 2.243    | 3.045     | 0.582   | 0.371    | 0.113     |
| GDI2        | 2.148       | 2.650    | 3.546     | 0.299   | 0.195    | 0.124     |

B)

| Gene symbol | Fold-change |          |           | p-value |          |           |
|-------------|-------------|----------|-----------|---------|----------|-----------|
|             | Acute       | Fibrosis | Cirrhosis | Acute   | Fibrosis | Cirrhosis |
| TPM1        | 1.772       | 1.003    | 2.793     | 0.535   | 0.997    | 0.208     |
| TPM2        | 1.362       | -2.492   | 3.788     | 0.394   | 0.183    | 0.160     |
| ANXA1       | -1.935      | 1.447    | 3.087     | 0.139   | 0.352    | 0.071     |
| PURA        | -5.044      | 1.025    | 3.038     | 0.238   | 0.988    | 0.442     |
| C1QC        | -4.489      | -1.332   | 2.552     | 0.050   | 0.741    | 0.301     |
| PGRMC2      | -2.576      | -1.117   | 1.334     | 0.243   | 0.924    | 0.763     |
| TTC39C      | -2.511      | -1.408   | 1.793     | 0.417   | 0.795    | 0.489     |
| SSBP1       | -33.94      | -1.553   | 1.727     | 0.001   | 0.481    | 0.428     |
| MRPL14      | 1.742       | 1.173    | 1.194     | 0.484   | 0.219    | 0.811     |
| IGF2        | 2.758       | 1.366    | -1.781    | 0.028   | 0.515    | 0.287     |
| H1f0        | 2.100       | 1.460    | -1.414    | 0.406   | 0.585    | 0.418     |
| HNRPA1      | 2.202       | 1.019    | 1.358     | 0.582   | 0.991    | 0.709     |
| GDI2        | 2.148       | 1.234    | 1.338     | 0.299   | 0.682    | 0.640     |

Table S16. Clinical characteristics.

| Clinical parameters | Healthy  | Cirrhosis  |
|---------------------|----------|------------|
| Age                 | 65.8 ± 6 | 63 ± 4.2   |
| Male                | 4 (80%)  | 4 (100%)   |
| Ethanol etiology    | -        | 4 (100%)   |
| Child Pugh A/B/C    | -        | 1/2/1      |
| MELD                | -        | 15.3 ± 2.7 |
| Decompensated       | -        | 4 (100%)   |
| Ascites             | -        | 4 (100%)   |
| N                   | 5        | 4          |

Table S17. Primary Antibodies.

| Antigen | Manufacturer | Reference | Dilution |
|---------|--------------|-----------|----------|
| CD32B   | ThermoFisher | MA5-32601 | 1:1000   |
| CD31    | Abcam        | ab32457   | 1:500    |
| CD63    | LifeSpan Bio | LS-188589 | 1:1000   |

|                   |                |            |        |
|-------------------|----------------|------------|--------|
| CD81              | BioRad         | MCA 1846   | 1:1000 |
| GRP78             | LifeSpan Bio   | LS-C209574 | 1:1000 |
| COX IV            | Cell Signaling | CS 11967   | 1:1000 |
| TPM1              | Cell Signaling | CS 3910    | 1:1000 |
| $\alpha$ -SMA     | Sigma          | 2547       | 1:200  |
| $\alpha$ -Tubulin | Sigma          | T9026      | 1:1000 |

**Table S18.** RT-qPCR primers.

| Gene            | Primer Sequence                                      | Species |
|-----------------|------------------------------------------------------|---------|
| Gapdh           | F:GGCATCGTGGAAGGGCTCAT<br>R:AGGGATGATGTTCTGGGCTGC    | Rat     |
| Col1 $\alpha$ 1 | F:GTACATCAGCCCAAACCCCA<br>R:TCGCTTCCATACTCGAACTGG    | Rat     |
| Pdgfr $\beta$   | F:GTCAATGTCCCTGTCCGTGT<br>R:GTGTGGGTGACAGTTTTTCGC    | Rat     |
| Hnf4 $\alpha$   | F:ACTCTCTAAAACCCTCGCCG<br>R:TCAGATGGGGATGTGTTCATTGC  | Rat     |
| Alb             | F:TTTCGCCGAGAAGCACACAA<br>R:TCGGCATTCTCATCAGCGAC     | Rat     |
| Slc10a1         | F:TCAAGCCTCCAAAGGACCAA<br>R:GCCATTAGGGGAAGGACCAG     | Rat     |
| Slc22a1         | F:CAGACAGGTTTGGCCGTAAG<br>R:GTAGCCAGAGCCGACAACT      | Rat     |
| Mrc1            | F:TCAACTCTTGGACTCACGGC<br>R:CATGATCTGCGACTCCGACA     | Rat     |
| Il-10           | F:CCTGGTAGAAGTGATGCCCC<br>R:AGACACCTTTGTCTTGGAGCTTAT | Rat     |
| Il-6            | F:TCCGGAGAGGAGACTTCACA<br>R:GCCATTGCACAACTCTTTTCT    | Rat     |
| Il-1 $\beta$    | F:GCTTCCTTGTGCAAGTGTCT<br>R:TCTGGACAGCCCAAGTCAAG     | Rat     |
| Acta2           | F:CTCATGCCATCATGCGTCTG<br>R:CACGCTCAGCAGTAGTCACG     | Rat     |

**Supplementary Figures**

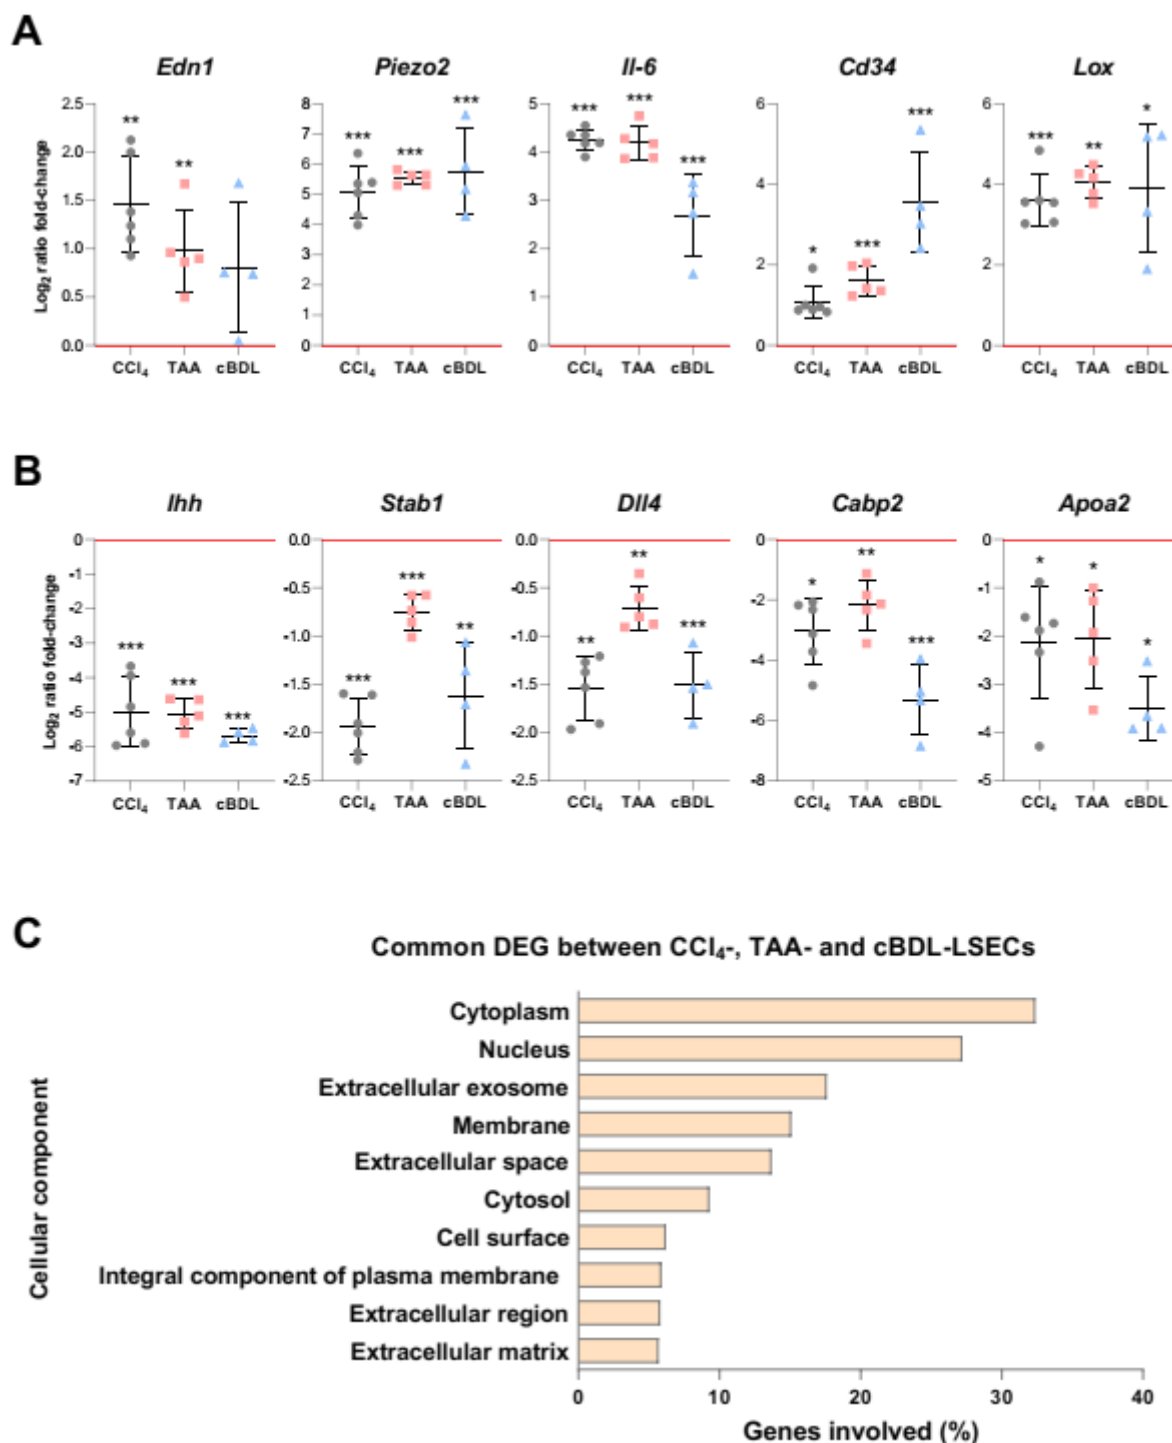

**Figure S1.** Common deregulated genes in CCI<sub>4</sub>-, TAA- and cBDL-cirrhotic LSECs. Up-regulated (A) and down-regulated (B) common characteristic genes in LSECs isolated from CCI<sub>4</sub>-, TAA- and cBDL-cirrhotic rats compared with corresponding healthy LSECs. Red line corresponds to healthy group. \* $p < 0.05$ , \*\* $p < 0.01$  and \*\*\* $p < 0.001$  vs. healthy cells. (C) Main cellular components described by Gene Ontology analyses of common differentially expressed genes (DEG) in three pre-clinical models of CLD. All cellular components are significant with  $p$ -value  $< 0.05$ .

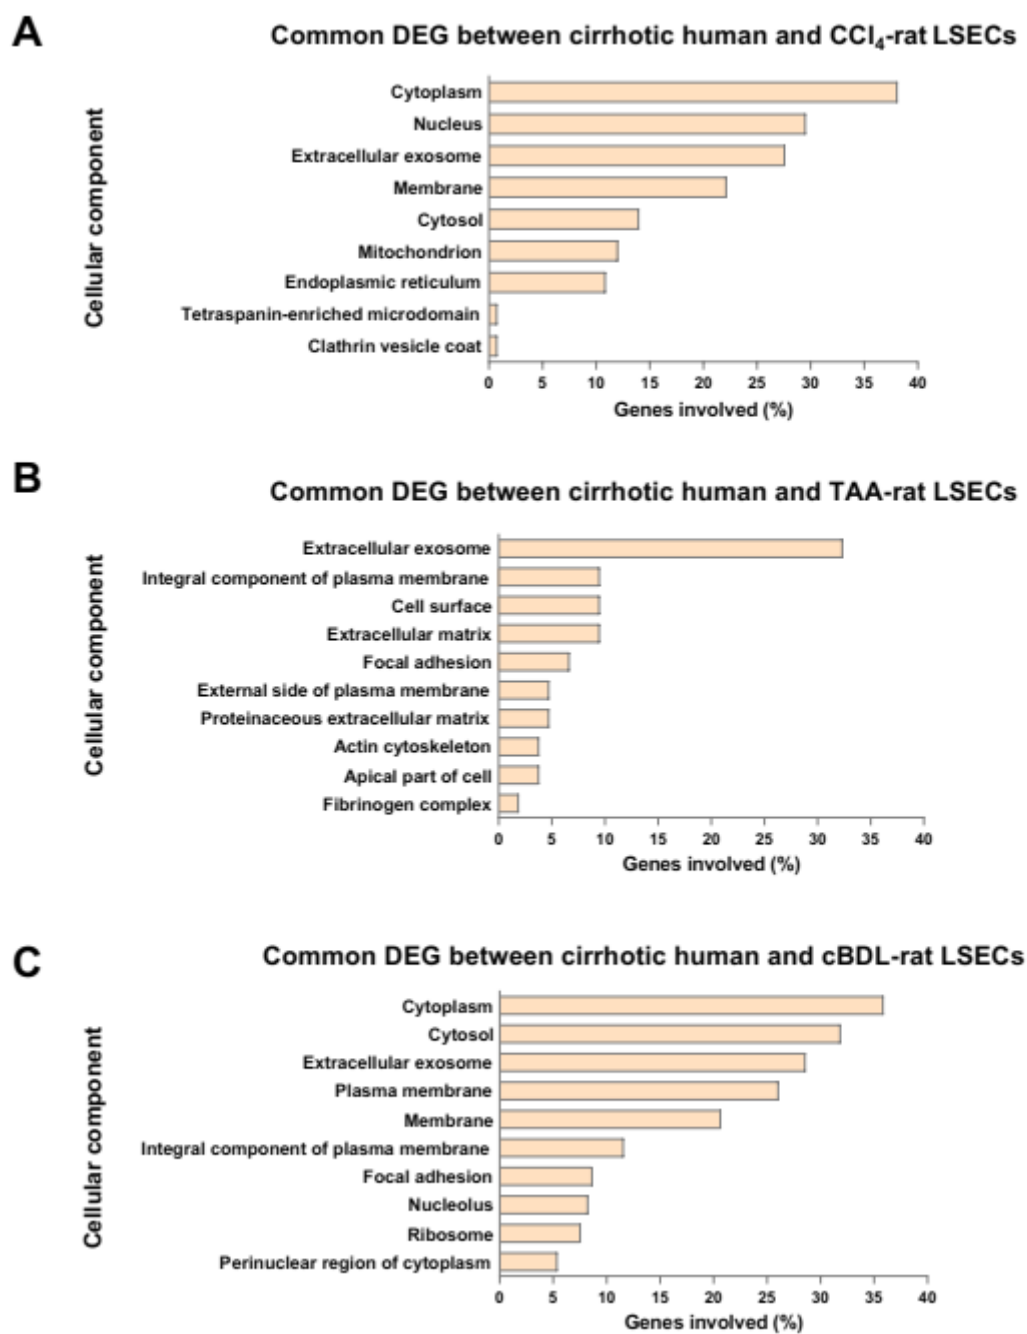

**Figure S2.** Cellular component analysis of commonly deregulated genes. Common deregulated genes analysed by Gene Ontology in LSECs from human cirrhotic and CCl<sub>4</sub>-LSECs (A), TAA-LSECs (B), and cBDL-LSECs (C). All cellular components are significant with p-value<0.05.



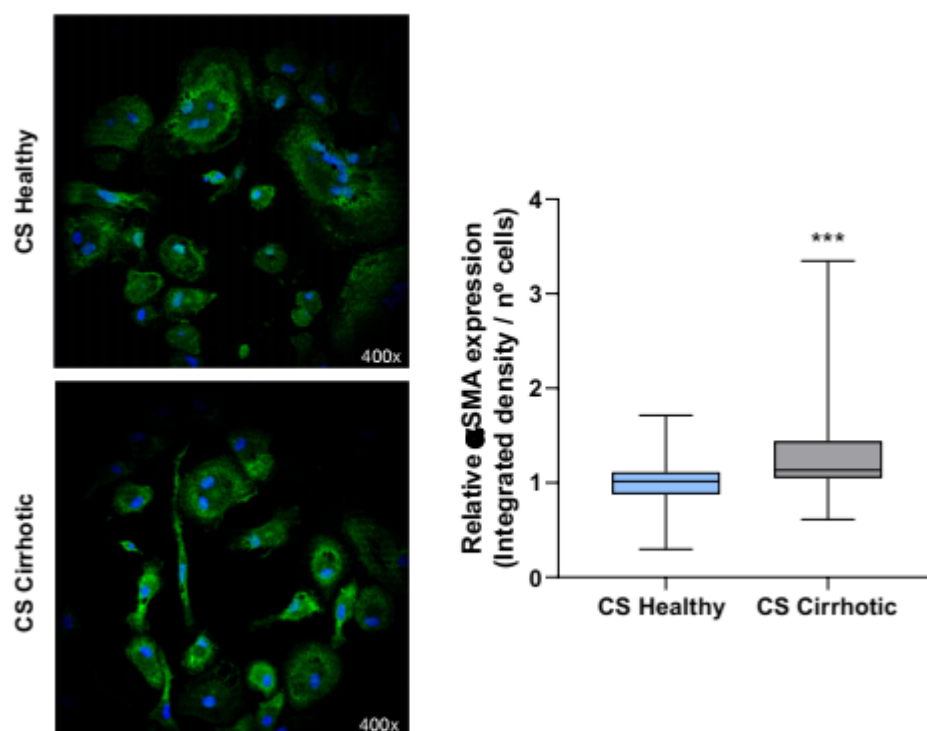

**Figure S3.** Effects of cirrhotic LSECs secretome in rat HSCs. Representative images of  $\alpha$ SMA immunofluorescence (green, 400X magnification) in healthy rat HSCs treated for 48h with 550 ng/ $\mu$ L of complete secretome (CS) from healthy or cirrhotic rat LSECs, and corresponding quantification. \*\*\* $p < 0.001$  ( $n = 3$  independent experiments) performing a t test with Mann-Whitney U test for non-parametric variables between groups.

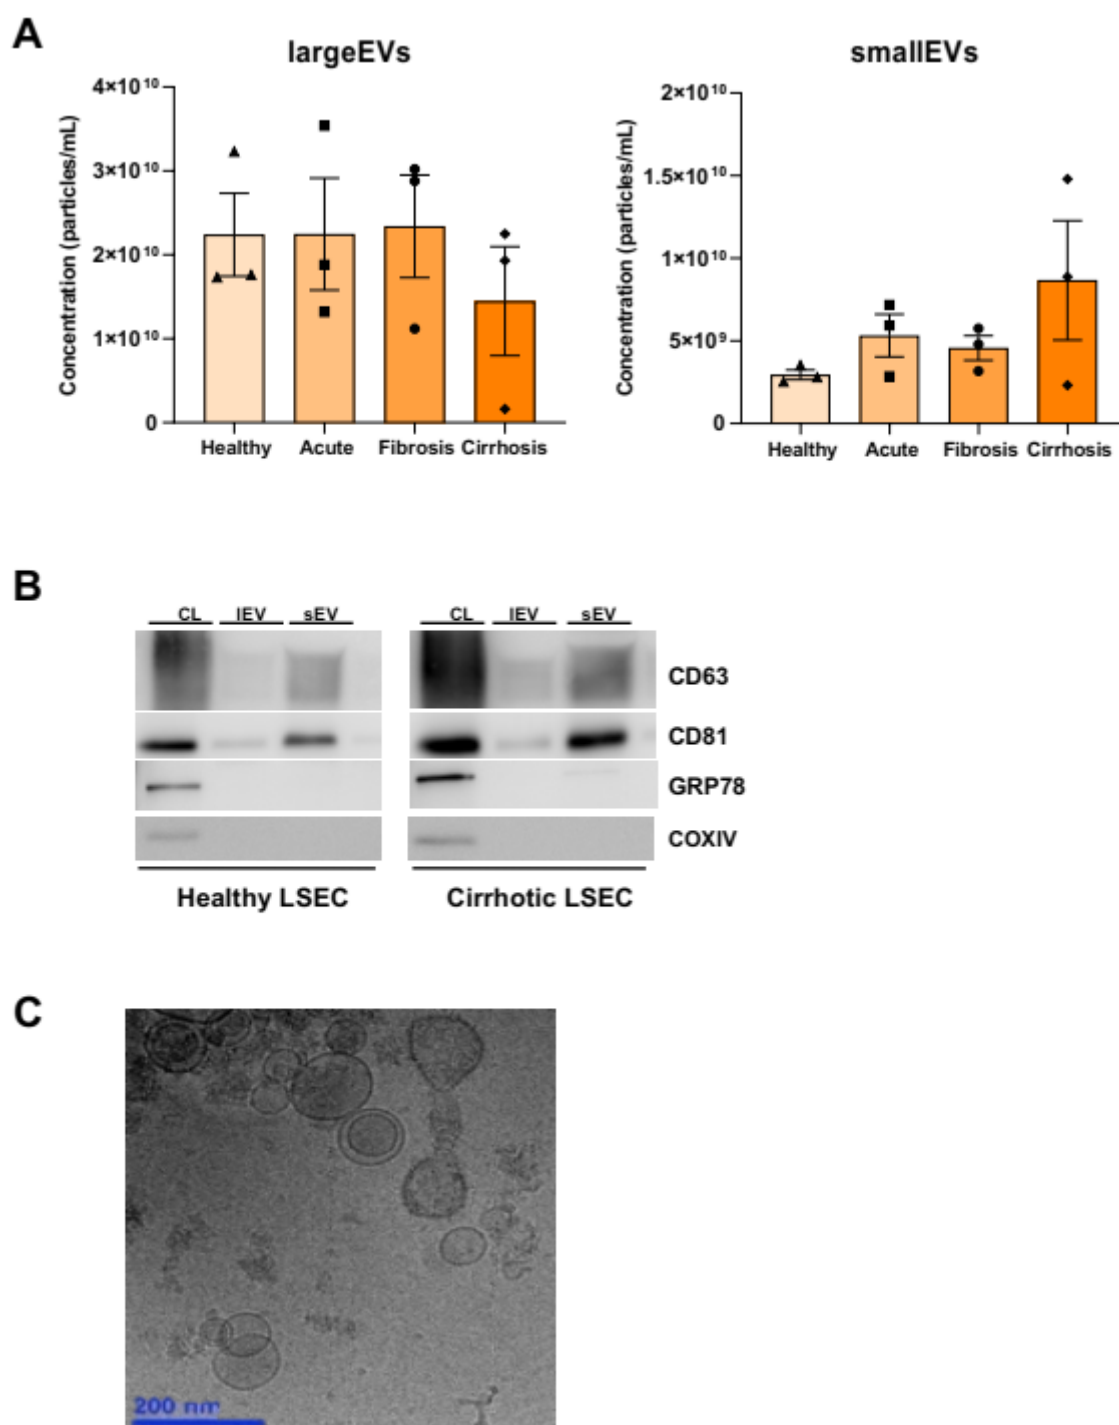

**Figure S4.** LSECs extracellular vesicles characterization. (A) Large and small extracellular vesicles (EVs) concentration in LSECs supernatant derived sub-fractions. (B) Protein expression of EVs markers in different secretome sub-fractions. (C) Representative image of EVs analysed by cryo-transmission electron microscopy. CL, cell lysate; IEVs, large extracellular vesicles, and sEVs, small extracellular vesicles. n=3 independent experiments.

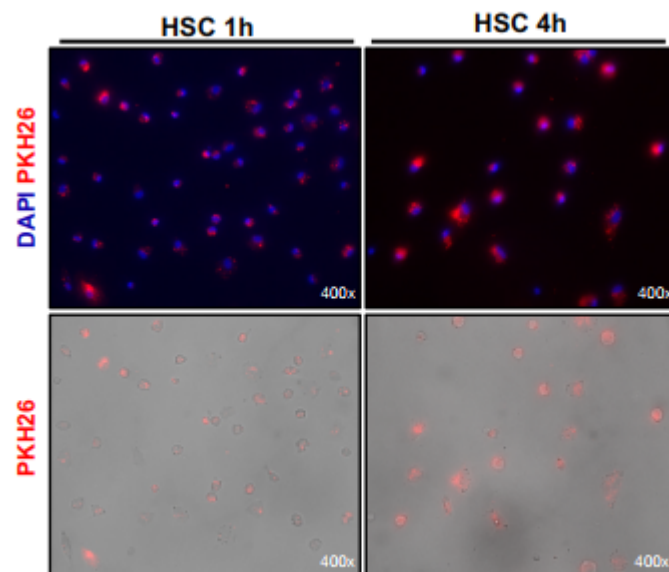

**Figure S5.** Extracellular vesicles internalization by HSCs. Small extracellular vesicles (sEVs) from cirrhotic LSECs were fluorescence-labelled and added to healthy rat HSCs at a concentration of 15 ng/ $\mu$ L. Representative images (400X magnification) shown after 1 and 4 hours of incubation. PKH26 (red), DAPI (blue).

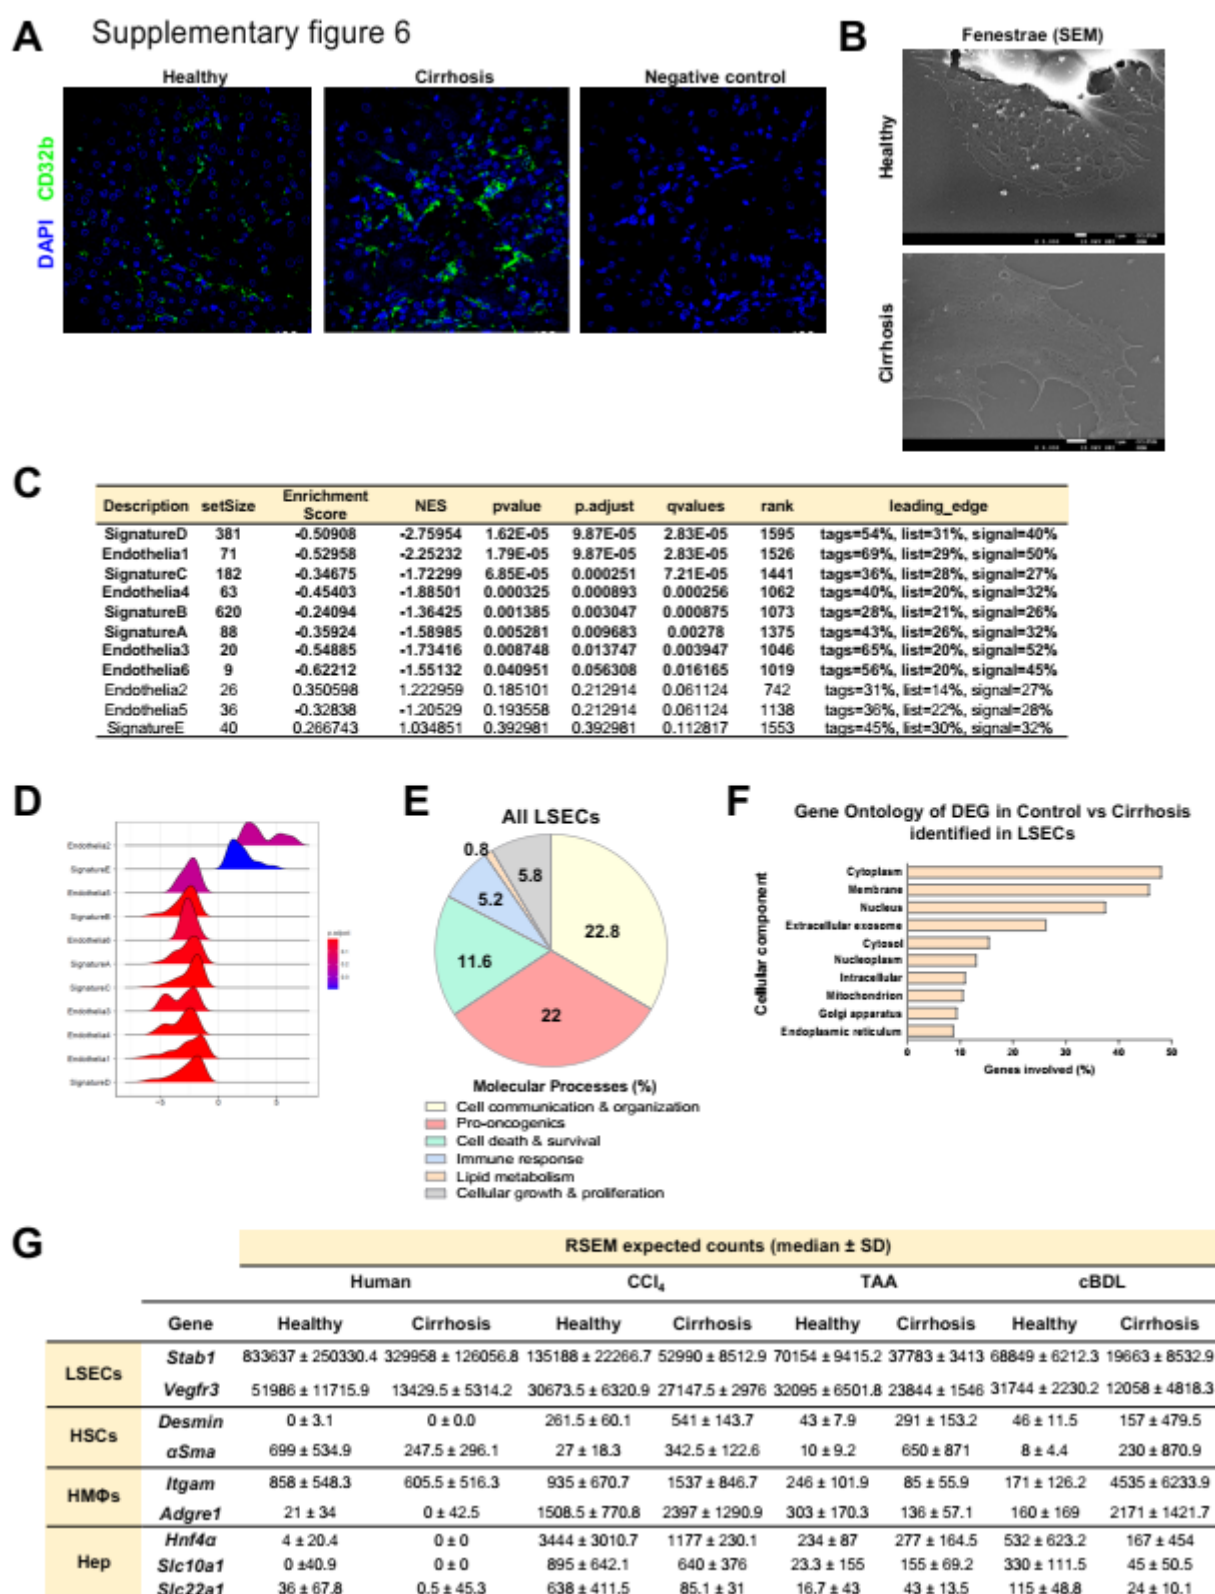

**Figure S6.** Primary LSECs isolation. (A) Representative images of CD32B immunofluorescence (400X magnification) in healthy and cirrhotic (due to chronic alcohol consumption) human liver tissue. (B) Fenestrae visualization using scanning electron microscopy in healthy and cirrhotic human LSECs. (C) Results of Gene Set Enrichment Analysis (GSEA) comparing the human CD32b+ LSECs used in this study and different subsets of endothelial cells described in [12]. Human CD32b+ LSECs showed statistically significant high concordance with sub-population Endo(1) (identified as LSECs), Endo(3) and Endo(6) (scar-associated LSECs). Interestingly, 54% of

genes in our human cells were defined by the signature D, characterized by vesicle-mediated transport, blood vessel development, endocytosis and immune response as principal processes described by Gene Ontology. (D) Representative ridgeplot for expression distributions of enriched genes in different subpopulations and signatures. (E) Molecular processes and (F) Gene Ontology analyses of LSECs identified in single-cell sequencing described in [13]. All cellular components are significant with  $p\text{-value} < 0.05$ . (G) Cell isolation purity expressed as RSEM expected counts from RNAseq of marker genes of LSECs (Stab1 and Vegfr3), HSCs ( $\alpha$ Sma and Desmin), hepatic macrophages (Itgam and Adgre1) and hepatocytes (HNF4a, Slc10a1 and Slc22a1) determined in LSECs isolated from healthy and cirrhotic human and rat livers (median  $\pm$  SD). SEM, scanning electron microscopy; NES, normalized enrichment scores; ns, not significant; CCl4: CCl4-induced rat cirrhosis; TAA: thioacetamide-induced rat cirrhosis; cBDL: common bile duct ligation-induced rat cirrhosis.

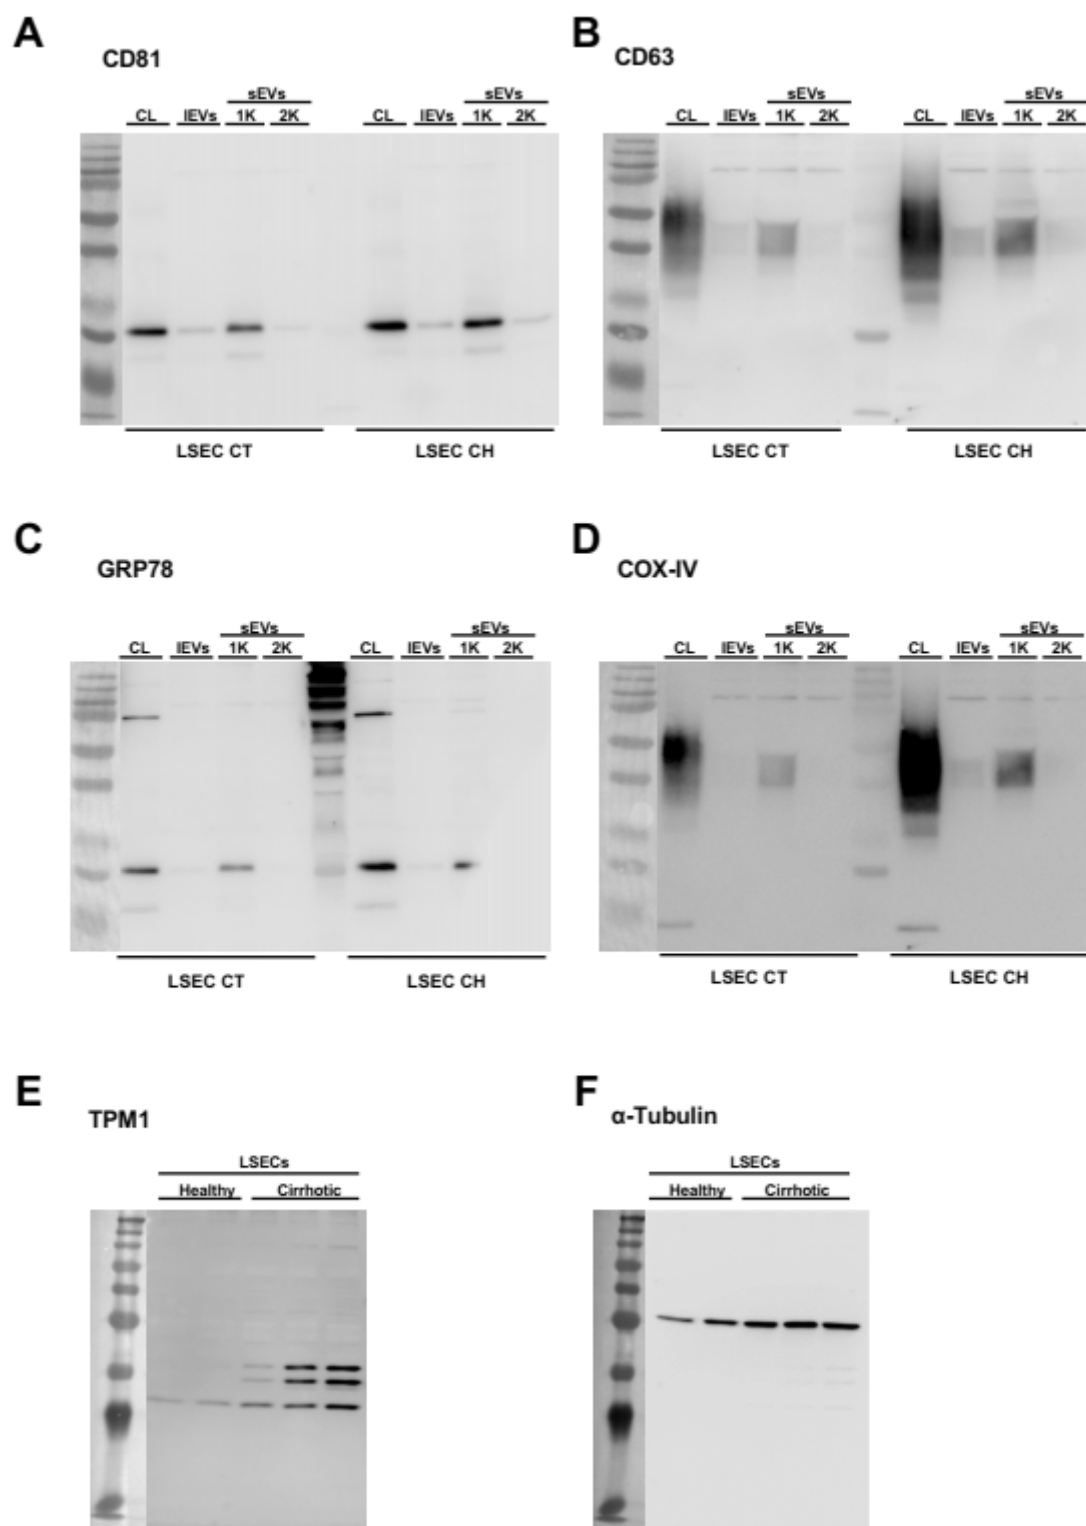

**Figure S7.** Western blot images. Whole nitrocellulose membranes of western blot assays performed in this study. (A) CD81, (B) CD63, (C) GRP78, (D) COXIV, (E) TPM1, and (F)  $\alpha$ -Tubulin.

### Supplementary References

1. Ortega-Ribera, M.; Fernández-Iglesias, A.; Illa, X.; Moya, A.; Molina, V.; Maeso-Díaz, R.; Fondevila, C.; Peralta, C.; Bosch, J.; Villa, R.; Gracia-Sancho, J. Resemblance of the Human Liver Sinusoid in a Fluidic Device With Biomedical And Pharmaceutical Applications. *Biotechnol Bioeng.* **2018**, *115* 2585–2594, doi:10.1002/bit.26776.

2. Øie, C.I.; Snapkov, I.; Elvevold, K.; Sveinbjørnsson, B.; Smedsrød, B. FITC Conjugation Markedly Enhances Hepatic Clearance of N-formyl Peptides. *PLoS One* **2016**, *11*, 160602, doi:10.1371/journal.pone.0160602.
3. Anania, J.C.; Chenoweth, A.M.; Wines, B.D.; Hogarth, P.M. The Human FcγRII (CD32) Family of Leukocyte FcR in Health and Disease. *Front. Immunol.* **2019**, *10*, 464, doi:10.3389/fimmu.2019.00464.
4. Ganesan, L.P.; Kim, J.; Wu, Y.; Mohanty, S.; Phillips, G.S.; Birmingham, D.J.; Robinson, J.M.; Anderson, C.L. FcγRIIb on Liver Sinusoidal Endothelium Clears Small Immune Complexes. *J. Immunol.* **2012**, *189*, 4981–4988, doi:10.4049/jimmunol.1202017.
5. Ramachandran, P.; Dobie, R.; Wilson-Kanamori, J.R.; Dora, E.F.; Henderson, B.E.P.; Luu, N.T.; Portman, J.R.; Matchett, K.P.; Brice, M.; Marwick, J.A.; et al. Resolving the fibrotic niche of human liver cirrhosis at single-cell level. *Nat. Cell Biol.* **2019**, *575*, 512–518, doi:10.1038/s41586-019-1631-3.
6. Théry, C.; Witwer, K.W.; Aikawa, E.; Alcaraz, M.J.; Anderson, J.D.; Andriantsitohaina, R.; Antoniou, A.; Arab, T.; Archer, F.; Atkin-Smith, G.K.; et al. Minimal information for studies of extracellular vesicles 2018 (MISEV2018): A position statement of the International Society for Extracellular Vesicles and update of the MISEV2014 guidelines. *J. Extracell. Vesicles* **2018**, *7*, 1535750, doi:10.1080/20013078.2018.1535750.
7. Wiśniewski, J.R.; Zougman, A.; Nagaraj, N.; Mann, M. Universal Sample Preparation Method for Proteome Analysis. *Nat Methods* **2009**, *6*, 359–362, doi:10.1038/nmeth.1322.
8. Meier, F.; Beck, S.; Grassl, N.; Lubeck, M.; Park, M.A.; Raether, O.; Mann, M. Parallel Accumulation–Serial Fragmentation (PASEF): Multiplying Sequencing Speed and Sensitivity by Synchronized Scans in a Trapped Ion Mobility Device. *J. Proteome Res.* **2015**, *14*, 5378–5387, doi:10.1021/acs.jproteome.5b00932.
9. Meier, F.; Brunner, A.-D.; Koch, S.; Koch, H.; Lubeck, M.; Krause, M.; Goedecke, N.; Decker, J.; Kosinski, T.; Park, M.A.; et al. Online Parallel Accumulation–Serial Fragmentation (PASEF) with a Novel Trapped Ion Mobility Mass Spectrometer. *Mol. Cell. Proteom.* **2018**, *17*, 2534–2545, doi:10.1074/mcp.tir118.000900.
10. Schindelin, J.; Arganda-Carreras, I.; Frise, E.; Kaynig, V.; Longair, M.; Pietzsch, T.; Preibisch, S.; Rueden, C.; Saalfeld, S.; Schmid, B.; et al. Fiji: An Open-Source Platform for Biological-Image Analysis. *Nature Methods* **2012**, *9*, 676–682, doi:10.1038/nmeth.2019.
11. Su, T.; Yang, Y.; Lai, S.; Jeong, J.; Jung, Y.; McConnell, M.; Utsumi, T.; Iwakiri, Y. Single-Cell Transcriptomics Reveals Zone-Specific Alterations of Liver Sinusoidal Endothelial Cells in Cirrhosis. *Cell. Mol. Gastroenterol. Hepatol.* **2021**, *11*, 1139–1161, doi:10.1016/j.jcmgh.2020.12.007.
12. Ramachandran, P.; Dobie, R.; Wilson-Kanamori, J.R.; Dora, E.F.; Henderson, B.E.P.; Luu, N.T.; Portman, J.R.; Matchett, K.P.; Brice, M.; Marwick, J.A.; et al. Resolving the fibrotic niche of human liver cirrhosis at single-cell level. *Nat. Cell Biol.* **2019**, *575*, 512–518, doi:10.1038/s41586-019-1631-3.
13. Su, T.; Yang, Y.; Lai, S.; Jeong, J.; Jung, Y.; McConnell, M.; Utsumi, T.; Iwakiri, Y. Single-Cell Transcriptomics Reveals Zone-Specific Alterations of Liver Sinusoidal Endothelial Cells in Cirrhosis. *Cell. Mol. Gastroenterol. Hepatol.* **2021**, *11*, 1139–1161, doi:10.1016/j.jcmgh.2020.12.007.
